1 RUNNING HEAD: EMPIRICAL ANOMALY ZONE IN PALAEOGNATHS

2

3 **Whole-genome analyses resolve the phylogeny of flightless birds**  
4 **(Palaeognathae) in the presence of an empirical anomaly zone**

5

6 Alison Cloutier<sup>1,2\*</sup>, Timothy B. Sackton<sup>3</sup>, Phil Grayson<sup>1,2</sup>, Michele Clamp<sup>3</sup>, Allan J. Baker<sup>4,5¶</sup>,  
7 Scott V. Edwards<sup>1,2</sup>

8

9 <sup>1</sup>*Department of Organismic and Evolutionary Biology, Harvard University, Cambridge MA USA*

10 <sup>2</sup>*Museum of Comparative Zoology, Harvard University, Cambridge MA USA*

11 <sup>3</sup>*Informatics Group, Harvard University, Cambridge MA USA*

12 <sup>4</sup>*Department of Ecology and Evolutionary Biology, University of Toronto, Toronto ON Canada*

13 <sup>5</sup>*Department of Natural History, Royal Ontario Museum, Toronto ON Canada*

14 <sup>¶</sup>*Deceased*

15 \*Corresponding author: [alison.cloutier@mail.utoronto.ca](mailto:alison.cloutier@mail.utoronto.ca)

16

17

18

19

20

21

22

23

24 **ABSTRACT**

25 Palaeognathae represent one of the two basal lineages in modern birds, and comprise the  
26 volant (flighted) tinamous and the flightless ratites. Resolving palaeognath phylogenetic  
27 relationships has historically proved difficult, and short internal branches separating major  
28 palaeognath lineages in previous molecular phylogenies suggest that extensive incomplete  
29 lineage sorting (ILS) might have accompanied a rapid ancient divergence. Here, we investigate  
30 palaeognath relationships using genome-wide data sets of three types of noncoding nuclear  
31 markers, together totalling 20,850 loci and over 41 million base pairs of aligned sequence data.  
32 We recover a fully resolved topology placing rheas as the sister to kiwi and emu + cassowary  
33 that is congruent across marker types for two species tree methods (MP-EST and ASTRAL-II).  
34 This topology is corroborated by patterns of insertions for 4,274 CR1 retroelements identified  
35 from multi-species whole genome screening, and is robustly supported by phylogenomic  
36 subsampling analyses, with MP-EST demonstrating particularly consistent performance across  
37 subsampling replicates as compared to ASTRAL. In contrast, analyses of concatenated data  
38 supermatrices recover rheas as the sister to all other non-ostrich palaeognaths, an alternative that  
39 lacks retroelement support and shows inconsistent behavior under subsampling approaches.  
40 While statistically supporting the species tree topology, conflicting patterns of retroelement  
41 insertions also occur and imply high amounts of ILS across short successive internal branches,  
42 consistent with observed patterns of gene tree heterogeneity. Coalescent simulations indicate  
43 that the majority of observed topological incongruence among gene trees is consistent with  
44 coalescent variation rather than arising from gene tree estimation error alone, and estimated  
45 branch lengths for short successive internodes in the inferred species tree fall within the  
46 theoretical range encompassing the anomaly zone. Distributions of empirical gene trees confirm

47 that the most common gene tree topology for each marker type differs from the species tree,  
48 signifying the existence of an empirical anomaly zone in palaeognaths.

49

50 *Keywords:* palaeognath, ratite, phylogenomics, retroelement, species tree, multispecies  
51 coalescent, incomplete lineage sorting, anomaly zone

52

### 53 **INTRODUCTION**

54 The scaling-up of multigene phylogenetic data sets that accompanied rapid advances in  
55 DNA sequencing technologies over the past two decades was at first heralded as a possible end  
56 to the incongruence resulting from stochastic error associated with single-gene topologies (Rokas  
57 et al. 2003, Gee 2003). However, it soon became clear that conflicting, but highly supported,  
58 topologies could result from different data sets when sequence from multiple genes was analyzed  
59 as a concatenated supermatrix, leading Jeffroy et al. (2006) to comment that phylogenomics –  
60 recently coming to signify the application of phylogenetic principles to genome-scale data  
61 (Delsuc et al. 2005) – could instead signal ‘the beginning of incongruence’. On the one hand,  
62 these observations highlighted the need for more sophisticated models to account for  
63 nonphylogenetic signal such as convergent base composition or unequal rates that can become  
64 amplified in large concatenated data sets (Jeffroy et al. 2006). But at the same time, there was a  
65 growing recognition that gene trees and species trees are not equivalent entities and that  
66 horizontal gene transfer, gene duplication and loss, and incomplete lineage sorting can result in  
67 heterogeneous topologies for gene trees that are all contained within a single overarching species  
68 tree history (Maddison 1997). When gene tree discordance arising from these biological factors  
69 predominates, concatenation approaches, which implicitly assume that all genes share the same

70 topology, can not only fail to recover the true species tree but can also infer erroneous  
71 relationships with strong support (Kubatko and Degnan 2007, Roch and Steel 2015). This  
72 recognition of the biological basis for gene tree discordance prompted proposals for a conceptual  
73 shift to adopt the multispecies coalescent model as a flexible and biologically realistic  
74 framework that incorporates population-level processes into phylogenetic inference (Degnan and  
75 Rosenberg 2009, Edwards 2009, Edwards et al. 2016).

76         Among the processes generating variation in gene tree histories, coalescent variation  
77 caused by incomplete lineage sorting (ILS) has received much attention, in part because it is the  
78 most ubiquitous and common form of gene tree–species tree incongruence (Edwards 2009).  
79 Incomplete lineage sorting occurs when ancestral polymorphisms do not reach fixation between  
80 successive divergences among taxa or, viewed from the opposite direction as deep coalescence,  
81 when alleles of two taxa fail to coalesce in their most recent common ancestor (Maddison 1997,  
82 Degnan and Rosenberg 2009). The likelihood of ILS increases when internal branches in the  
83 species tree are short relative to the effective population size and this phenomenon is therefore  
84 likely to accompany many rapid radiations that are the focus of evolutionary studies (Song et al.  
85 2012, Liu et al. 2015b). A surprising outcome of ILS under the multispecies coalescent is that  
86 there exist branch lengths in the species tree for which the most probable gene tree topology  
87 differs from that of the species tree, producing a zone where these anomalous gene trees (AGTs)  
88 predominate in the gene tree distribution (the ‘anomaly zone’, Degnan and Rosenberg 2006).  
89 The anomaly zone carries clear implications for phylogenetic inference, since any method  
90 employing a democratic vote among loci will fail in this region of tree space (Degnan and  
91 Rosenberg 2006, 2009; Huang and Knowles 2009). Incomplete lineage sorting is documented  
92 for many taxa (e.g. Prüfer et al. 2012, Song et al. 2012, Suh et al. 2015), and the theoretical basis

93 of the anomaly zone is well established (Degnan and Rosenberg 2006, 2009; Rosenberg 2013).  
94 However, an empirical anomaly zone has thus far only been reported in Scincidae skinks  
95 (Linkem et al. 2016) and the general relevance of this phenomenon to empirical studies has been  
96 questioned (Huang and Knowles 2009).

97         Short branches that produce high amounts of incomplete lineage sorting are also expected  
98 to carry relatively few informative substitutions (Huang and Knowles 2009, Xi et al. 2015).  
99 Observed gene tree heterogeneity accompanying an inferred empirical anomaly zone could  
100 therefore reflect uninformative gene trees rather than truly anomalous ones (Huang and Knowles  
101 2009). More generally, gene tree estimation error has been raised as a potential concern for  
102 current methods of species tree inference even outside of the anomaly zone (Liu et al. 2015c,  
103 Roch and Warnow 2015). Fully coalescent single-step Bayesian methods that coestimate gene  
104 trees with the species tree, despite providing the most seamless statistical environment for testing  
105 phylogenetic hypotheses using the coalescent (Xu and Yang 2016), are as yet computationally  
106 prohibitive for large data sets (Liu et al. 2015c, Edwards 2016a), motivating the development of  
107 many two-step methods that use estimated gene trees as input for species tree inference  
108 (reviewed in Liu et al. 2015a, Edwards 2016a). These summary methods can show good  
109 performance under simulation (Liu et al. 2010, Mirarab et al. 2016), sometimes even within the  
110 anomaly zone (Liu et al. 2010), but assume that gene trees are known without error. Simulation  
111 studies have shown that summary species tree methods can still perform well in the presence of  
112 gene tree estimation error (e.g. Liu et al. 2010, Mirarab et al. 2016), and recent results from  
113 coalescent simulations (Xi et al. 2015) and analysis of empirical data (Blom et al. 2017) indicate  
114 that the accuracy of species tree inference can be improved by adding more loci, even if those  
115 loci are minimally informative (Xu and Yang 2016). However, whether these observations apply

116 broadly across empirical data sets is as yet unknown, and it is also crucial that gene tree error, if  
117 it occurs, is unbiased (Xi et al. 2015). It is therefore imperative for empirical studies to carefully  
118 consider the underlying gene tree support for inferred species trees and to assess consistency of  
119 results across analysis methods and data types.

120 Here, we use genome-wide data sets of three types of noncoding markers (conserved non-  
121 exonic elements [CNEEs], introns, and ultraconserved elements [UCEs]) to investigate  
122 relationships within the Palaeognathae, one of the two basal lineages of modern birds (the other  
123 being Neognathae, which includes the Galloanserae [gamebirds + waterfowl] and Neoaves [all  
124 other birds]). Palaeognaths encompass the flighted tinamous (Tinamiformes) of South and  
125 Central America and the flightless ratites, including the African ostrich (Struthioniformes),  
126 Australian emu and Australasian cassowaries (Casuariiformes), New Zealand kiwi  
127 (Apterygiformes), and South American rheas (Rheiformes) as well as the recently extinct New  
128 Zealand moa (Dinornithiformes) and Madagascan elephant birds (Aepyornithiformes).  
129 Palaeognath phylogenetic relationships have remained controversial for over a century (reviewed  
130 in Houde 1988, Cracraft et al. 2004), and recent molecular studies have added to the debate by  
131 placing the tinamous as sister to the moa within a paraphyletic ratite clade (Phillips et al. 2010,  
132 Haddrath and Baker 2012, Baker et al. 2014) and recovering an unexpected sister-group  
133 relationship between kiwi and elephant birds (Mitchell et al. 2014, Greal et al. 2017, Yonezawa  
134 et al. 2017). These findings have important implications for our understanding of Gondwanan  
135 biogeography and the possibility that morphological convergence has accompanied multiple  
136 independent losses of flight in the ratites (Harshman et al. 2008, Haddrath and Baker 2012,  
137 Baker et al. 2014, Sackton et al. 2018).

138 Although ratite paraphyly is strongly supported by all recent molecular studies (Hackett

139 et al. 2008, Harshman et al. 2008, Phillips et al. 2010, Haddrath and Baker 2012, Smith et al.  
140 2013, Baker et al. 2014, Mitchell et al. 2014, Grealy et al. 2017, Yonezawa et al. 2017), rheas  
141 have been variously placed as the sister to all other non-ostrich palaeognaths (e.g. Hackett et al.  
142 2008, Harshman et al. 2008, Phillips et al. 2010, Mitchell et al. 2014, Prum et al. 2015 and  
143 others), to tinamous (Harshman et al. 2008, Smith et al. 2013; note that moa sequences were  
144 absent from these analyses), or to a clade containing emu, cassowary, and kiwi (Haddrath and  
145 Baker 2012, Prum et al. 2015), with the same data sometimes producing conflicting results under  
146 different analysis regimes (e.g. Harshman et al. 2008, Smith et al. 2013, Prum et al. 2015).  
147 Alternative placements of rheas are often accompanied by low bootstrap support, and it is  
148 suspected that ILS across short internal branches separating major palaeognath lineages could  
149 underlie some of the difficulties in resolving phylogenetic relationships within this group  
150 (Haddrath and Baker 2012).

151 Newly available whole-genome sequences (Zhang et al. 2014, Le Duc et al. 2015,  
152 Sackton et al. 2018) allow investigation of palaeognath relationships at a phylogenomic scale.  
153 Recently, we reported fully congruent results using the coalescent species tree method MP-EST  
154 (Liu et al. 2010) that recovered rheas as the sister to emu/cassowary + kiwi. These results were  
155 consistent across marker type and robust to the effects of missing data, alignment uncertainty,  
156 and outgroup choice, but differed from the incongruent results obtained under concatenation  
157 (Sackton et al. 2018). Here, we corroborate the species tree topology inferred from sequence-  
158 based analysis with genome-wide screening for informative presence/absence insertions of CR1  
159 retroelements, and incorporate results from a second species tree method (ASTRAL, Mirarab and  
160 Warnow 2015) to further strengthen support for this topology relative to that obtained from  
161 concatenated sequence data. Additionally, we employ phylogenomic subsampling to investigate

162 consistency in the underlying signal for conflicting relationships recovered from species tree  
163 versus concatenation approaches, and use likelihood evaluation and coalescent simulation to  
164 assess the underlying gene tree support for the recovered species tree topology and the existence  
165 of an empirical anomaly zone in palaeognaths. Throughout, we consider the variation in signal  
166 among classes of noncoding nuclear markers that are becoming increasingly adopted for  
167 genome-scale analyses (Edwards et al. 2017), and contrast the relative performance of these  
168 markers under different analysis regimes to resolve historically challenging relationships among  
169 Palaeognathae.

170

## 171 **MATERIALS & METHODS**

### 172 *Data set compilation*

173 We assembled data sets for three types of noncoding nuclear markers: conserved non-  
174 exonic elements (CNEEs), introns, and ultraconserved elements (UCEs) for 14 palaeognath  
175 species and a chicken outgroup from publicly available whole-genome sequence assemblies  
176 (Suppl. Table S1). We chose to analyze noncoding sequences primarily because coding regions  
177 across large taxonomic scales in birds are known to experience more severe among-lineage  
178 variation in base composition than noncoding regions, which can complicate phylogenetic  
179 analysis (Jarvis et al. 2014, Reddy et al. 2017). On the other hand, noncoding markers can be  
180 more challenging to align than coding markers, and the three marker types we analyze here  
181 exhibit a range of variation and alignment challenges (Edwards et al. 2017).

182 We filtered the 1,949,832 conserved elements (CEs) identified statistically by Sackton et  
183 al. (2018) to omit elements overlapping annotated exon, gene, or CDS features in the galGal4  
184 chicken genome release (NCBI annotation release 102) to generate a candidate set of 811,696



185 conserved non-exonic elements (CNEEs). This set was further filtered to retain 16,852 elements  
186 greater than 250 bp in length. Orthologous sequence from 10 newly published palaeognath  
187 genomes (Sackton et al. 2018) as well as ostrich (*Struthio camelus*) and white-throated tinamou  
188 (*Tinamus guttatus*) genomes from the Avian Phylogenomics Project (Zhang et al. 2014) was  
189 compiled by lifting over reference genome coordinates from chicken to each target palaeognath  
190 in an existing 42 species multiway whole-genome alignment (WGA, Sackton et al. 2018) with  
191 HAL Tools v.2.1 (Hickey et al. 2013). Liftover output was parsed to retain only uniquely  
192 mapping regions between the chicken reference and target palaeognath genomes. CNEEs with  
193 no missing taxa from the 12 palaeognaths included in the whole-genome alignment, and with at  
194 least as many variable sites as taxa were retained (N= 14,528 loci). Loci overlapping the set of  
195 UCEs described below were omitted using BEDTools v. 2.26.0 (Quinlan and Hall 2010), leaving  
196 a data set of 12,676 CNEEs.

197 Candidate introns were identified using BEDTools to output coordinates for annotated  
198 intron features in the galGal4 genome release that did not overlap with any annotated exon  
199 feature. Chicken coordinates for these introns were lifted over to target palaeognaths in the  
200 whole-genome alignment as described for CNEEs above, filtered to remove duplicated regions,  
201 and expected exon/intron boundaries in each palaeognath sequence were refined by making  
202 intron coordinates flush to liftovers for adjacent exon sequences. Candidate introns within each  
203 palaeognath species were omitted if shorter than 100 bp, if longer than 100 kb, or if longer than  
204 10 kb and more than 50% longer than the chicken reference intron length. After adding  
205 sequence from the published North Island brown kiwi (Le Duc et al. 2015) and little bush moa  
206 (Cloutier et al. 2018) as described below, one intron per gene was chosen, requiring a minimum  
207 pairwise sequence identity of 70% and fewer than 0.5 undetermined sites (e.g. gaps and Ns) per

208 bp aligned sequence, and then choosing among multiple introns per gene based on the smallest  
209 number of missing taxa and longest average unaligned input sequence length across taxa. This  
210 produced a final data set of 5,016 introns, each originating from a different gene.

211 Ultraconserved elements (UCEs) were compiled using the set of 3,679 bioinformatically  
212 harvested UCEs from the Avian Phylogenomics Project (Jarvis et al. 2014, 2015; accessed from  
213 <http://dx.doi.org/10.5524/101041>). In addition to chicken, we used ostrich and white-throated  
214 tinamou included in the Avian Phylogenomics Project data as reference species to lift over to all  
215 other palaeognaths in the whole-genome alignment. Liftover output from these multiple  
216 reference taxa was parsed to omit duplicated regions and tiled for regions that were consistent  
217 across reference species. A maximum of one missing taxon per locus from the 12 palaeognaths  
218 in the whole-genome alignment was allowed, resulting in a data set of 3,158 UCEs.

219 Blastn searches with NCBI's default 'somewhat similar' parameters (evalue 1e-10,  
220 perc\_identity 10, penalty -3, reward 2, gapopen 5, gapextend 2, word size 11) were used with  
221 query sequence from each of the three kiwi species included in the whole-genome alignment to  
222 identify orthologous regions in the North Island brown kiwi (*Apteryx mantelli*, Le Duc et al.  
223 2015), which was not included in the WGA. North Island brown kiwi sequence was added for  
224 loci that had consistent top hits across blastn searches, with a single high-scoring segment pair  
225 (HSP) covering at least 50% of the input query sequence and minimum 80% sequence identity.  
226 Using this approach, we added *A. mantelli* sequence for 11,534/12,676 CNEEs (91% of total),  
227 2,560/5,016 introns (51%), and 2,033/3,158 UCEs (64%).

228 Sequence was also added from a reference-based genome assembly of the extinct little  
229 bush moa (*Anomalopteryx didiformis*, Cloutier et al. 2018) that was generated by mapping moa  
230 reads to the emu genome included in the whole-genome alignment. Emu coordinates from the

231 liftover approach outlined above were used to retrieve the corresponding region in moa, and moa  
232 sequence was retained if it spanned at least 30% of the emu reference length or was at least 200  
233 bp in length, excluding Ns. Moa sequence was added for 12,643/12,676 CNEEs (99.7%),  
234 4,982/5,016 introns (99.3%), and 3,146/3,158 UCEs (99.6%).

235 Sequences for each locus were retrieved from genome assemblies and aligned *de novo*  
236 with MAFFT v. 7.245 (Katoh and Standley 2013) using default options for global iterative  
237 alignment for CNEEs (option ‘ginsi’) and local iterative alignment for introns and UCEs (option  
238 ‘linsi’). This produced data sets of 4,794,620 bp of aligned sequence for the 12,676 CNEEs,  
239 27,890,802 bp for 5,016 introns, and 8,498,759 bp for 3,158 UCEs.

#### 240 *Gene tree inference*

241 Best maximum likelihood trees were built with RAxML v. 8.1.5 (Stamatakis 2014) from  
242 unpartitioned alignments for each locus using a GTR+GAMMA substitution model and 20  
243 independent searches beginning with randomly generated starting trees. Topologies were also  
244 inferred for 500 bootstrap replicates per locus, with a GTR+GAMMA model on unpartitioned  
245 data in RAxML.

#### 246 *Species tree inference*

247 MP-EST v. 1.5 (Liu et al. 2010) analyses were conducted with three full runs per data set  
248 beginning with different random number seeds and with ten independent tree searches within  
249 each run. The species tree topology was inferred using best maximum likelihood gene trees as  
250 input, and node support was estimated from MP-EST runs using gene tree bootstrap replicates as  
251 input.

252 ASTRAL-II v. 4.10.9 (Mirarab and Warnow 2015, hereafter ‘ASTRAL’) was also run  
253 using the best maximum likelihood gene trees to infer the species tree topology, and the 500

254 gene tree bootstrap replicates to estimate node support. To permit direct comparison across  
255 methods, the default quadripartition support values output by ASTRAL were replaced with  
256 traditional bipartition supports by plotting output bootstrap replicates from ASTRAL on the  
257 inferred species tree topology using RAxML.

258 To investigate the effects of concatenation on phylogenetic inference, ExaML v. 3.0.16  
259 (Kozlov et al. 2015) was used to infer maximum likelihood topologies from fully partitioned (i.e.  
260 1 partition per locus) concatenated data sets using a GTR+GAMMA substitution model.  
261 Twenty-one full tree searches were run for each data set, with 20 searches beginning from  
262 complete random starting trees, and one additional search using a random stepwise addition  
263 order parsimony starting tree. A minimum of 50 bootstrap replicates were computed for each  
264 data set, with additional replicates performed as necessary until convergence was reached as  
265 assessed by bootstopping analysis with a majority-rule consensus tree criterion implemented in  
266 RAxML.

267 For all three methods, bootstrap supports were placed on the inferred species tree using  
268 RAxML, and trees were outgroup rooted with chicken using ETE v. 3 (Huerta-Cepas et al.  
269 2016).

### 270 *Phylogenomic subsampling*

271 In addition to the traditional bootstrapping approaches outlined above, phylogenomic  
272 subsampling (Blom et al. 2016; reviewed in Edwards 2016b) was used to assess the consistency  
273 of the underlying support for conflicting clades. For each marker type (CNEEs, introns, and  
274 UCEs), loci were randomly sampled with replacement to create subsets of 50, 100, 200, 300,  
275 400, 500, 1000, 1500, 2000, 2500, and 3000 loci. This process was repeated ten times to create a  
276 total of 110 data sets per marker type (e.g. 10 replicates of 50 loci each, 10 replicates of 100 loci,

277 etc. for each of CNEEs, introns, and UCEs). Topologies were inferred for bootstrap replicates of  
278 each data set using MP-EST, ASTRAL, and ExaML as described above. However, for reasons  
279 of computational tractability, 200 rather than 500 bootstrap replicates were used for each method  
280 (including ExaML), and MP-EST was run once (rather than three times) for each data set,  
281 although still with ten tree searches within each run.

282 Support for alternative hypotheses regarding the sister group to the rheas, and the sister to  
283 emu + cassowary, was estimated by first counting the number of bootstraps that recovered each  
284 alternative topology from the 200 bootstraps run for each replicate, and then calculating the  
285 mean value for each hypothesis across the ten replicates within each data set size category.

#### 286 *Analysis of incomplete lineage sorting (ILS) and gene tree heterogeneity*

287 Analyses of gene tree heterogeneity were conducted using both the best maximum  
288 likelihood trees inferred by RAxML, as well as majority-rule extended consensus trees generated  
289 from RAxML bootstrap replicates. Most analyses of topological incongruence required an  
290 identical taxon sampling across gene trees; however, there was a much larger amount of missing  
291 data for North Island brown kiwi than for other taxa, in part because this species was added *post*  
292 *hoc* to data sets that were compiled for species included in the whole-genome alignment and in  
293 part because the assembly quality of this species was lower than for those palaeognaths in the  
294 WGA. We therefore pruned North Island brown kiwi from all gene trees, and omitted loci that  
295 were missing any other taxa. This approach retained 12,643/12,676 CNEEs (99.7% of loci),  
296 4,982/5,016 introns (99.3%), and 2,866/3,158 UCEs (90.8%).

297 Gene support frequency (GSF) and internode certainty ‘all’ (ICA, Salichos et al. 2014)  
298 were calculated with RAxML. Distributions of gene tree topologies were calculated by  
299 computing all pairwise Robinson-Foulds (RF) cluster distances on outgroup rooted gene trees

300 with TreeCmp v. 1.1-b308 (Bogdanowicz et al. 2012) and parsing the output into mutually  
301 compatible sets of trees with identical topology where RF= 0. Numbers of substitutions  
302 occurring on braches conflicting with the species tree topology were inferred under a parsimony  
303 criterion in PAUP v. 4.0a151 (Swofford 2002).

304       Relative support for each gene tree topology was assessed by computing  $\Delta$ AIC from the  
305 log-likelihood score (lnL) of the inferred gene tree and lnL when the input alignment for each  
306 locus was constrained to the species tree topology. Both likelihood values were calculated in  
307 RAxML on unpartitioned alignments with a GTR+GAMMA substitution model, and branch  
308 lengths were optimized for each topology, a criterion for applying the  $\Delta$ AIC approach.

309       Approximately unbiased (AU) tests were run in IQ-TREE v. 1.5.4 (Nguyen et al. 2015).  
310 For each locus, we tested the estimated gene tree topology against an *a priori* candidate set of  
311 probable trees that enforced monophyly of the five higher-level palaeognath lineages (kiwi, emu  
312 + cassowary, rheas, moa + tinamous, ostrich), but allowed all possible rearrangements among  
313 those lineages (for a total of 105 trees in the candidate set, plus the gene tree topology itself if it  
314 did not occur within this set). We also tested gene trees against a second set of candidate  
315 topologies using the same criteria as above, but additionally allowing all possible rearrangements  
316 within a monophyletic tinamou clade (for 1,575 candidate topologies). For each gene, in  
317 addition to the reported P-value for the fit of the species tree topology, we also calculated the  
318 rank of the species tree topology relative to all tested candidates from P-values sorted in  
319 ascending order.

320       The proportion of observed gene tree heterogeneity consistent with coalescent variation  
321 was estimated through simulation. For each marker type, we estimated ultrametric species tree  
322 branch lengths in mutational units ( $\mu$ T, where  $\mu$  is the mutation rate per generation and T is the

323 number of generations) by constraining concatenated alignments of all loci to the species tree  
324 topology with a GTR+GAMMA substitution model and strict molecular clock in PAUP. For this  
325 purpose, we ignore the additional mutations incurred due to variation in ancestral lineages in the  
326 species tree (Angelis and dos Reis 2015), as well as misestimation of the number of mutations  
327 due to deviation of the gene trees from the species tree (Mendes and Hahn 2016). These  
328 mutational branch lengths were used in combination with the MP-EST and ASTRAL species tree  
329 branch lengths in coalescent units ( $\tau = T/4N_e$ ) to calculate the population size parameter theta ( $\Theta$ )  
330 for each internal branch following Degnan and Rosenberg (2009), where  $(\Theta/2) \cdot T/N_e = \mu T$   
331 which reduces to  $\Theta = \mu T/\tau$ . Theta for terminal branches was set to a constant value of 1; this  
332 value had no impact on simulated gene trees because we simulated only one allele per species.

333 10,000 gene trees were simulated from species trees using these mutational branch  
334 lengths and theta values for each data set (e.g. CNEEs, introns, and UCEs, with theta derived  
335 from both MP-EST and ASTRAL branch lengths) using the `sim.coaltree.sp` function in Phybase  
336 v. 1.5 (Liu and Yu 2010). Pairwise Robinson-Foulds cluster and matching cluster distances of  
337 each simulated gene tree to the species tree topology were calculated with TreeCmp  
338 (Bogdanowicz et al. 2012). The ratio of mean gene tree–species tree distances for simulated  
339 gene trees relative to mean distances for empirically estimated gene trees was calculated as a  
340 measure of the amount of observed gene tree heterogeneity that can be accounted for by  
341 coalescent processes.

342 Rooted triplets were generated by pruning all possible combinations of three ingroup taxa  
343 plus the chicken outgroup from each gene tree with ETE. Proportions of the major (species tree)  
344 triplet and the two alternative minor triplets were calculated for all species trios, as well as for  
345 combinations of higher level lineages (e.g. all trios involving one kiwi, one rhea, and either emu

346 or cassowary). We followed the approach of Song et al. (2012) to account for non-independence  
347 of sampled trios when calculating proportions for higher-level lineages by assigning the most  
348 commonly occurring triplet combination for each gene and omitting genes with ties before  
349 tallying triplet counts across all genes. Observed triplet values were compared to expected  
350 proportions calculated using branch lengths in coalescent units from MP-EST and ASTRAL  
351 species trees, where the expected frequency of the major triplet equals  $1 - 2/3 \exp(-t)$  and the two  
352 minor triplets equal  $1/3 \exp(-t)$ , with  $t$  representing the internal branch length in the triplet  
353 (Pamilo and Nei 1988).

354 Equation 4 from Degnan and Rosenberg (2006) was used to calculate the value  $a(x)$  for  
355 each internal branch  $x$  measured in coalescent units from MP-EST and ASTRAL species trees.  
356 Calculated  $a(x)$  values were compared to coalescent branch lengths for each descendent internal  
357 branch  $y$ , with  $y < a(x)$  providing evidence that this region of the species tree falls within the  
358 zone where anomalous gene trees (AGTs) are expected – the anomaly zone. In addition to  
359 calculations from species tree branch lengths, which are derived from input best maximum  
360 likelihood gene trees, we also performed anomaly zone calculations for each of the 500 species  
361 tree bootstrap replicates using scripts provided by Linkem et al. 2016 (accessed from  
362 <http://datadryad.org/resource/doi:10.5061/dryad.sf6s9>).

### 363 *CR1 retroelement insertions*

364 Patterns of CR1 retroelement insertions were used to corroborate findings from sequence-  
365 based analyses for all palaeognath species included in the whole-genome alignment (therefore  
366 excluding the North Island brown kiwi and little bush moa). Draft genomes for each species  
367 were repeat masked using RepeatMasker v. 4.0.5 (Smit et al. 2015) with RepBase Update  
368 20140131, the sensitive search option, and query species 'vertebrata metazoa'. RepeatMasker



369 output was parsed to retain simple CR1 insertions at least 50 bp in length, omitting overlapping  
370 and nested insertions. Coordinates for up to 500 bp of flanking sequence to either side of CR1  
371 insertions in each species were retrieved and lifted over to every other target palaeognath species  
372 in the whole-genome alignment with HAL Tools.

373 Liftover coordinates were parsed to exclude duplicated regions, and orthologous loci  
374 were compiled across species with BEDTools and custom Perl scripts. Loci with sequence from  
375 at least one taxon for each major lineage (kiwi, emu + cassowary, rheas, ostrich, and tinamous)  
376 and with phylogenetically informative insertion patterns were retained (i.e. excluding  
377 symplesiomorphies shared by all palaeognaths or autapomorphic insertions unique to a single  
378 species). Sequence for each locus was extracted from genome assemblies and *de novo* aligned  
379 with MAFFT using default parameters for global alignment. Presence/absence scores based on  
380 RepeatMasker annotations were bioinformatically reassessed in aligned sequence data, and  
381 sequences with gaps spanning the CR1 insertion site were rescored as 'omitted'. Loci with flush  
382 insertion boundaries and identifiable target site duplications (TSDs) at least 2 bp in length were  
383 retained, and all retained alignments were visually inspected. RepeatMasker output for these loci  
384 was parsed to verify that putative orthologous insertions shared the same CR1 subtype, insertion  
385 orientation, and degree of fragmentation. Sequence from chicken was added to alignments for  
386 CR1 insertions that grouped all non-ostrich palaeognaths to verify insertion boundaries and  
387 confirm that CR1 absence was not due to a secondary deletion within this genomic region in  
388 ostrich. Statistical support for conflicting patterns of CR1 insertions was calculated with the  
389 KKSC insertion significance tests of Kuritzin et al. (2016).

390

391 **RESULTS**

392 *Coalescent species tree methods, but not concatenation, recover congruent palaeognath*  
393 *relationships*

394 Using genome-wide data sets of 12,676 CNEEs, 5,016 introns, and 3,158 UCEs, we  
395 recover fully congruent topologies across all marker types and for the combined total evidence  
396 tree using MP-EST and ASTRAL coalescent species tree approaches (Fig. 1, Suppl. Fig. S1a-h;  
397 N.B. following Liu et al. 2015b and Edwards 2016a, we note the distinction between fully  
398 coalescent MP-EST and ASTRAL, whose clustering algorithm is not strictly coalescent, but  
399 hereafter refer to both methods as ‘coalescent’). Maximal support is obtained throughout for  
400 MP-EST and for the ASTRAL species tree built from CNEEs, but with reduced support for the  
401 placement of rheas as the sister to a clade containing kiwi and emu + cassowary for ASTRAL  
402 trees inferred from introns and UCEs (95% and 83% bootstrap support, respectively). In  
403 contrast, ExaML inference from concatenated data sets places the rheas as sister to all other non-  
404 ostrich palaeognaths with full support for introns and reduced support for CNEEs (60%) and  
405 UCEs (90%, Suppl. Fig. S1i-l). ExaML analyses are also inconsistent across marker types in  
406 their placement of a casuariiform clade comprising emu and cassowary, where introns recover a  
407 sister group relationship to kiwi as is seen for MP-EST and ASTRAL, but with casuariiforms  
408 instead placed as the sister to moa + tinamous with 60% support for CNEEs and 96% support for  
409 UCEs (Suppl. Fig. S1).

410 Robustness of the underlying signal for these inconsistently recovered relationships was  
411 further assessed with phylogenomic subsampling, which uses a variation of double bootstrapping  
412 (Seo et al. 2008) to generate replicate data sets with increasing numbers of randomly sampled  
413 loci, each of which is then subject to traditional bootstrap resampling across sites. MP-EST  
414 analyses rapidly accumulate support for a sister-group relationship between rheas and

415 emu/cassowary + kiwi, where 100% support is consistently recovered across replicates with an  
416 intermediate number of loci (e.g. with > 500 loci, Fig. 2a-c, Fig. 3a,j), and with support for  
417 alternative hypotheses sharply dropping off for replicates with greater than 200 loci. Support  
418 accumulates more slowly for ASTRAL, but the hypothesis of rheas as sister to emu/cassowary +  
419 kiwi clearly dominates and support for alternatives declines in replicates with more than 1000  
420 loci for all markers (Fig. 2d-f, Fig. 3). In contrast, subsampling replicates are less consistent for  
421 relationships inferred under concatenation with ExaML (Fig. 2g-i, Fig. 3). In particular, CNEEs  
422 oscillate between recovering rheas as the sister to moa + tinamous, or the sister to all other non-  
423 ostrich palaeognaths, although always with low bootstrap support (Fig. 2g, Fig. 3g). The other  
424 two marker types more clearly support the topology recovered from full data sets with ExaML  
425 that place rheas as sister to the remaining non-ostrich palaeognaths, although bootstrap support  
426 for UCE replicates is generally weak (Fig. 2h,i; Fig. 3).

427         Subsampling provides even more robust support for emu + cassowary as the sister to  
428 kiwi, with both MP-EST and ASTRAL quickly accumulating support for this clade and with  
429 rapidly declining support for all other hypotheses (Suppl. Fig. S2a-f, Suppl. Fig. S3). ExaML  
430 intron replicates also steadily accumulate support for this relationship with an increasing number  
431 of loci (Suppl. Fig. S2h, Suppl. Fig. S3h,q). The alternative hypothesis of emu + cassowary as  
432 sister to moa + tinamous, which is favored by CNEEs and UCEs analyzed within a concatenation  
433 framework, is not well supported by subsampling, where conflicting topologies characterized by  
434 low support are recovered across ExaML replicates (Suppl. Fig. S2g,i; Suppl. Fig. S3).

#### 435 *CR1 retroelement insertions corroborate findings from sequence-based analyses*

436         Patterns of CR1 retroelement insertions corroborate both the inferred species tree  
437 topology from MP-EST and ASTRAL and the existence of substantial conflicting signal

438 consistent with incomplete lineage sorting across short internal branches. In total, 4,301  
439 informative CR1 insertions were identified from multispecies genome-wide screens, the vast  
440 majority of which (4,274 of 4,301, or 99.4%) are entirely consistent with relationships inferred  
441 from sequence-based analyses (Fig. 4a; analysis here was restricted to species in the whole-  
442 genome alignment, and little bush moa and North Island brown kiwi are therefore not included).  
443 Not surprisingly, we identify many more insertion events occurring along shallower branches  
444 with longer estimated lengths and fewer insertions along shorter branches that form the backbone  
445 of the inferred species tree (refer to Fig. 1 for estimated branch lengths).

446         Of the 27 (0.6%) CR1s that are inconsistent with the species tree topology, two conflict  
447 with the inferred relationships within kiwi, and nine contradict relationships among tinamous  
448 (Fig. 4b,c). However, in each case, conflicting CR1s are far outweighed by markers that support  
449 the species tree topology, providing robust support from statistical tests of insertion significance  
450 (i.e. the KKSC tests of Kuritzin et al. 2016,  $P= 1.1e^{-66}$  in support of inferred kiwi relationships,  
451  $P= 8.8e^{-24}$  for Chilean tinamou + elegant crested tinamou, and  $P= 8.4e^{-152}$  for thicket + white-  
452 throated tinamous). A further five insertions are inconsistent with tinamous as sister to a clade  
453 containing rheas, kiwi, and emu + cassowary and would instead place tinamous as sister to just  
454 one of these other lineages (Fig. 4d). Again, species tree relationships are statistically supported  
455 for comparisons of all trios despite these contradictory markers. For example, while  
456 casuariiforms (emu and cassowary) and kiwi each share one CR1 insertion exclusively with  
457 tinamous, they have 12 insertions shared with each other to the exclusion of tinamous, therefore  
458 supporting emu/cassowary + kiwi with  $P= 8.2e^{-05}$ . Similar calculations support rheas with  
459 emu/cassowary to the exclusion of tinamous at  $P= 0.0018$ , and rheas with kiwi to the exclusion  
460 of tinamous at  $P= 0.004$ .

461 Perhaps most strikingly, we identified six CR1s shared by rheas and emu/cassowary to  
462 the exclusion of all other palaeognaths, including kiwi, and five CR1s shared by rheas and kiwi  
463 alone (Fig. 4e). Together with the 12 insertions shared by emu, cassowary and kiwi, these  
464 patterns are still sufficient to support the inferred relationship of rheas as the sister to an  
465 emu/cassowary + kiwi clade ( $P= 0.048$ ), but indicate substantial conflict in this region of the  
466 tree, mirroring the results from sequence-based analysis. Symmetric numbers of CR1s  
467 supporting the two conflicting topologies further suggest that ILS, rather than ancestral  
468 hybridization, underlies the observed conflicts. Insertion significance tests accordingly support  
469 the bifurcating species tree topology rather than a reticulate hybridization network or unresolved  
470 polytomy among these three lineages (Kuritzin et al. 2016). We also note that no CR1 insertions  
471 were recovered to support the alternative placement of rheas as the sister to all other non-ostrich  
472 palaeognaths as produced by concatenation-based analyses (i.e. no CR1s were shared by emu,  
473 cassowary, kiwi, and tinamous, but absent from rheas and ostrich).

474 *Patterns of gene tree heterogeneity suggest substantial incomplete lineage sorting (ILS) and an*  
475 *empirical anomaly zone*

476 We investigated gene tree heterogeneity using both the maximum likelihood estimates of  
477 gene trees and the majority rule extended consensus of bootstrap replicates. These analyses  
478 produced similar results and are therefore reported for consensus gene trees only.

479 Distributions of estimated gene tree topologies illustrate that the most common topology  
480 for each marker type is not the species tree topology inferred by MP-EST and ASTRAL, thereby  
481 suggesting the existence of an empirical anomaly zone (Fig. 5a-c). While the ranking of specific  
482 gene tree topologies differs across marker types, common to these anomalous gene trees that  
483 occur at higher frequency than the species tree topology is the fact that both the shallowest clades

484 as well as the deepest split between the ostrich and all other palaeognaths are maintained  
485 throughout (Fig. 5d). Rearrangements of AGTs relative to the MP-EST and ASTRAL species  
486 tree topology instead involve the two short internal branches forming the common ancestor of  
487 emu and cassowary with kiwi, and with this clade to rheas (Fig. 5d).

488 To more fully investigate the observed gene tree heterogeneity, we considered all  
489 estimated gene trees on a clade-by-clade basis by calculating the gene support frequency (GSF),  
490 which tallies the number of genes that recover each bipartition in the inferred species tree, and  
491 the internode certainty ‘all’ statistic (ICA, Salichos et al. 2014), which incorporates the  
492 frequencies of all commonly occurring bipartitions (Fig. 6). Clades that are recovered  
493 consistently in both coalescent and concatenation approaches (e.g. ostrich sister to other  
494 palaeognaths, emu + cassowary, moa + tinamous, interrelationships within kiwi, and within  
495 tinamous) are also typically supported by the majority of individual gene trees, although single-  
496 gene support is weaker for CNEEs (Fig. 6a). However, low (near zero) internode certainty ‘all’  
497 values for emu/cassowary + kiwi indicate that alternative bifurcations occur at roughly equal  
498 frequency in the input set of gene trees, and the negative ICA for the relationship of this clade  
499 with rheas means that the emu/cassowary + kiwi + rhea clade is actually recovered less often  
500 than alternatives.

501 We next considered whether topological differences between estimated gene trees and the  
502 species tree are well supported, or are instead likely to primarily reflect gene tree estimation  
503 error. Mean bootstrap support for estimated gene trees is relatively high, especially for introns  
504 and UCEs (83.9% and 82.8% respectively, Fig. 7a-c). However, average support falls by about  
505 10% for each marker type when gene tree bootstrap replicates are constrained to the species tree  
506 topology, with  $P < 0.0001$  for paired t-tests of each data set. These results suggest that

507 differences from the species tree are broadly supported by variation in sequence alignments for  
508 individual loci. To test this further, we compared the difference in Akaike information criterion  
509 (AIC) for estimated gene trees to the AIC obtained when the sequence alignment for each gene  
510 was constrained to the species tree topology. Approximately 80% of CNEEs have  $\Delta$ AIC (gene  
511 tree–species tree) less than -2, indicating substantial support in favor of the gene tree topology  
512 relative to that of the species tree (Burnham and Anderson 2002), while the proportion was even  
513 greater for introns and UCEs (approximately 90% with  $\Delta$ AIC < -2, Fig. 7d). Despite this result,  
514 approximately unbiased (AU) tests typically failed to reject a hypothesis that the data fit the  
515 species tree topology, with only about 20% of introns and UCEs, and 30% of CNEEs rejecting  
516 the species tree topology at  $P < 0.05$  (Fig. 7d). However, the species tree topology is also not  
517 commonly amongst the top 5% of candidate alternative topologies when these alternatives are  
518 ranked according to increasing AU test P-value within each locus (Fig. 7d).

519 In keeping with the results for all loci, gene tree topologies are also generally supported  
520 for loci falling within AGT groups. Support for individual gene trees is somewhat weak for  
521 CNEEs, with low median bootstrap support and few substitutions occurring along branches that  
522 conflict with the species tree topology (Suppl. Fig. S4a,d), which is consistent with the shorter  
523 average alignment length and lower variability of these loci (Suppl. Fig. S5). However, support  
524 is much stronger for introns and UCEs, with most loci having bootstrap support above 50% for  
525 conflicting clades and  $\Delta$ AIC < -2 indicating much stronger likelihood support for the recovered  
526 gene tree topology relative to that obtained if sequence alignments are constrained to match the  
527 inferred species tree (Suppl. Fig. S4).

528 Simulations were used to further assess what proportion of total gene tree heterogeneity  
529 is likely attributable to coalescent processes rather than to gene tree estimation error (Fig. 8).

530 Using either Robinson-Foulds (RF) distances or the matching cluster distance, which is  
531 influenced less by the displacement of a single taxon than is the RF metric (Bogdanowicz et al.  
532 2012), and simulating from coalescent branch lengths estimated with either MP-EST or  
533 ASTRAL for each marker type, we find that coalescent processes alone can account for more  
534 than 70% of the observed gene tree heterogeneity in most comparisons, and >90% for introns  
535 when gene trees are simulated from MP-EST coalescent branch lengths (Fig. 8).

536 *Observed gene tree heterogeneity and anomalous gene trees (AGTs) are consistent with*  
537 *expectations from coalescent theory*

538 Analysis of rooted triplets, where gene trees are decomposed into all possible  
539 combinations of three species plus the outgroup, corroborate relationships inferred by MP-EST,  
540 which also relies on rooted triplets (Liu et al. 2010) and ASTRAL, which instead uses unrooted  
541 quartets (Mirarab and Warnow 2015), with the major, or most frequent, topology for all species  
542 trios matching that of the species tree. Observed counts of the major and two minor topologies  
543 for the rhea, kiwi, and emu+cassowary lineages (i.e. from sampling all trios that contain one  
544 representative of each lineage) also occur in proportions that are consistent with coalescent  
545 theory, based on the estimated length of the internal branch within the trio (Pamilo and Nei 1988,  
546 Fig. 9 Fisher's exact  $P > 0.9$  for all comparisons of observed proportions to those expected from  
547 either MP-EST or ASTRAL branch lengths). Similar to the results from conflicting CR1  
548 insertions, the two minor topologies for rooted triplets occur at almost equal frequencies, which  
549 is consistent with coalescent variation arising from incomplete lineage sorting rather than  
550 alternative processes such as introgression. Also notable are the similar triplet proportions  
551 observed for all three marker types, which suggest that gene tree estimation error and/or  
552 systematic biases within datasets alone are unlikely to explain the observed results.



553           The identity and frequency of observed anomalous gene trees are also consistent with  
554 expectations from coalescent theory. Following Degnan and Rosenberg (2006) and Rosenberg  
555 (2013), branch lengths in coalescent units estimated with either MP-EST (Fig. 10) or ASTRAL  
556 (Suppl. Fig. S6) have values expected to produce AGTs across the short successive internal  
557 branches separating rheas, emu+cassowary, and kiwi for all marker types. Branch lengths for  
558 CNEEs, but not introns or UCEs, are also consistent with AGTs arising across branches  
559 separating moa + tinamous from the remaining non-ostrich palaeognaths. Inference of these  
560 anomaly zones applied equally when using species tree branch lengths, or for branch lengths  
561 from each bootstrap replicate (i.e. every bootstrap replicate that recovers the species tree  
562 topology also places these regions of tree space within the anomaly zone).

563

## 564 **DISCUSSION**

565           High-throughput sequencing has revolutionized the scale at which phylogenetic inference  
566 is being made, facilitating a phylogenomics era with unparalleled opportunity to not only resolve  
567 difficult taxonomic relationships but also to better understand the underlying evolutionary  
568 processes that have given rise to current biodiversity. In birds, recent large-scale efforts using  
569 sequence capture methodologies (McCormack et al. 2013, Prum et al. 2015) and whole-genome  
570 sequencing (Jarvis et al. 2014) have helped resolve higher-level interrelationships within  
571 Neoaves. Still, some relationships remain poorly resolved or have discordant results across  
572 analyses (Suh et al. 2015, Suh 2016, Reddy et al. 2017). Retroposon insertion patterns suggest  
573 that a large amount of incomplete lineage sorting (ILS) accompanied a rapid Neoavian radiation  
574 (Suh et al. 2015), prompting some authors to propose a hard polytomy involving nine lineages at  
575 the base of this group (Suh 2016). Others have stressed the importance of data-type effects in

576 explaining the observed topological incongruence for some clades, and urge researchers to  
577 incorporate evidence from as many different marker types as possible when addressing difficult  
578 phylogenetic questions (Edwards et al. 2017, Reddy et al. 2017). Together, these results  
579 illustrate the advances made with genome-scale data, but also highlight that large amounts of  
580 data alone are not necessarily sufficient to resolve deep divergences in the Avian Tree of Life  
581 (Philippe et al. 2011).

582 In parallel, there has been a renewed focus on palaeognath phylogeny throughout the past  
583 decade largely motivated by reports that the volant (flighted) tinamous are nested within  
584 palaeognaths rather than forming the sister to a clade of flightless ratites (Hackett et al. 2008,  
585 Harshman et al. 2008, Phillips et al. 2010, Haddrath and Baker 2012, Baker et al. 2014) and  
586 more recent findings that the extinct elephant birds of Madagascar are sister to the New Zealand  
587 kiwi (Mitchell et al. 2014, Grealy et al. 2017, Yonezawa et al. 2017). These relationships are  
588 consistently recovered across recent molecular phylogenies, but conflicting results for other  
589 relationships suggest that ILS across short internal branches in palaeognaths could mirror the  
590 discord arising from rapid ancient divergences seen in Neoaves.

591 We recover a topology placing rheas as sister to emu/cassowary + kiwi that is congruent  
592 across all analyses for MP-EST and ASTRAL species tree methods, but that differs from the  
593 placement of rheas as sister to the remaining non-ostrich palaeognaths when concatenated data  
594 are analyzed. These conflicting topologies are recovered with maximal support in at least some  
595 data sets for both coalescent and concatenation analyses. However, subsampling approaches that  
596 incorporate resampling across genes as well as sites (double bootstrapping, Seo et al. 2008,  
597 Edwards 2016b) provide more robust support for the coalescent species tree, and this topology is  
598 further corroborated by patterns of CR1 retroelement insertions from multiway genome-wide

599 screening. However, conflicting CR1 insertions suggest extensive ILS across short internal  
600 branches separating major palaeognath lineages, and coalescent lengths for these pairs of  
601 branches fall within the theoretical range expected to produce anomalous gene trees. We indeed  
602 find that the most common gene tree for each marker type does not match the inferred species  
603 tree topology, consistent with an empirical anomaly zone in palaeognaths.

604         Although we contrast results from concatenation and coalescent species tree methods, we  
605 reiterate previous statements that concatenation should be viewed as a specialized case of the  
606 multispecies coalescent rather than in strict opposition to it (Liu et al. 2015a,c; Edwards 2016a;  
607 Edwards et al. 2016). Concatenation is expected to perform well when coalescent variation  
608 among gene trees is low (Liu et al. 2015a,b; Tonini et al. 2015; Mirarab et al. 2016), and we find  
609 that most palaeognath relationships are robustly supported by both concatenation and coalescent  
610 methods as well as by CR1 insertions. Of particular note, we recover congruent topologies  
611 across all sequence-based analyses that nest the tinamous as the sister group to moa within a  
612 paraphyletic ratite clade. This moa-tinamou clade is supported even at the level of individual  
613 loci, where 94% of both introns and UCEs recover this relationship. Ratite paraphyly is further  
614 corroborated by 18 retroelement insertions that are shared by tinamous and non-ostrich  
615 palaeognaths, whereas no CR1s supporting ratite monophyly were found.

616         Unlike the case described above, gene tree heterogeneity resulting from coalescent  
617 processes can yield topologies with high support for erroneous clades under concatenation, since  
618 this method assumes that all genes evolve with a common topology (Kubatko and Degnan 2007;  
619 Liu et al. 2015a,c; Roch and Steel 2015; Edwards et al. 2016). In contrast, the multispecies  
620 coalescent models gene trees as conditionally independent variables and, by accommodating  
621 gene tree heterogeneity, can accurately infer species tree topologies under high levels of ILS and

622 even in the extreme case of the anomaly zone (Liu et al. 2010, 2015c; Edwards et al. 2016;  
623 Mirarab et al. 2016). We believe this fundamental difference in approaches to species tree  
624 inference underlies the discordant placements of rheas in our concatenation and coalescent  
625 analyses. While recognizing caveats pertaining to possible data-type effects of coding sequence  
626 (Reddy et al. 2017), we also note that ASTRAL analysis of anchored hybrid enrichment loci by  
627 Prum et al. (2015) produced an identical topology to our coalescent species tree for palaeognaths,  
628 whereas Bayesian estimation from concatenated loci was identical to our concatenated analyses  
629 of CNEEs and UCEs under maximum likelihood.

630         Symmetrical counts for the two minor triplet topologies of rheas, emu + cassowary, and  
631 kiwi, as well as the symmetry of conflicting retroelement insertions for these alternative  
632 hypotheses, suggest a role for ILS in producing gene tree heterogeneity. Importantly, though,  
633 both the major triplet topology and statistical tests of CR1 insertions support rheas as sister to  
634 emu/cassowary + kiwi within an overarching bifurcating species tree topology as recovered by  
635 MP-EST and ASTRAL (Pamilo and Nei 1988, Kuritzin et al. 2016). Retroelement support for  
636 the alternative placement of rheas as sister to all other non-ostrich palaeognaths as found by  
637 concatenation is entirely absent, whereas CR1 support for a sister-group relationship of emu and  
638 cassowary with tinamous, as found under concatenation for CNEEs and UCEs, is strongly  
639 rejected in favor of emu/cassowary + kiwi as occurs in all other analyses, including concatenated  
640 introns. Instances of retroposon homoplasy through exact parallel insertions or precise deletion  
641 are known, but are believed to be rare (Han et al. 2011, Ray et al. 2006, Suh et al. 2015). These  
642 results thus strongly corroborate both the inferred species tree topology and the existence of  
643 substantial ILS across short internodes separating several palaeognath lineages. We emphasize  
644 that the large amount of gene tree heterogeneity in this study is mostly generated by only two

645 short internodes. Our study thus underscores how small numbers of short branches in the species  
646 tree can nonetheless generate substantial heterogeneity of largely similar gene trees differing by  
647 a small number of nodes.

648         A question raised for empirical studies is the degree to which gene tree estimation error  
649 impacts the performance of summary species tree methods such as MP-EST and ASTRAL that  
650 use estimated gene trees as input, since these methods assume gene tree heterogeneity arises  
651 from coalescent variation rather than from analytical errors associated with low information  
652 content of individual loci, alignment uncertainty, mutational bias, or inappropriate models of  
653 sequence evolution (Huang and Knowles 2009, Roch and Warnow 2015, Xi et al. 2015, Blom et  
654 al. 2017). We find high average bootstrap support for estimated gene trees and high gene  
655 support frequencies for most palaeognath relationships, indicating that marker choice is  
656 appropriate to address these questions and gene tree uncertainty is largely confined to the short  
657 internal branches inferred to lie within the anomaly zone. Despite this uncertainty, we find that  
658 most loci (80-90%) contain variation that is sufficient to support their inferred gene tree topology  
659 relative to that of the species tree in likelihood comparisons, and simulations indicate that, for  
660 most comparisons, more than 70% of the observed gene tree heterogeneity can be accounted for  
661 by coalescent processes alone. While gene tree estimation error certainly occurs in our data set,  
662 the consistency of rooted triplet proportions across the three marker types further suggests that,  
663 on the whole, estimated gene trees for these data sets provide an adequate and unbiased  
664 representation of the coalescent variation in gene tree histories.

665         Simulations have shown that gene tree summary methods can accurately infer the species  
666 tree topology despite gene tree estimation error if the sampling of gene trees is sufficiently large  
667 and gene tree inference is unbiased (Liu et al. 2015a,c; Xi et al. 2015; Mirarab et al. 2016; Xu

668 and Yang 2016). Adding weak genes to data sets decreased the performance of summary  
669 methods such as MP-EST relative to data sets of strong genes alone, but these methods are  
670 nevertheless expected to converge upon the correct estimate of the species tree with an  
671 increasing number of genes, even if those genes are minimally informative (Xi et al. 2015, Xu  
672 and Yang 2016). These inferences could explain observed patterns for CNEEs, which are on  
673 average much shorter and less variable than introns or UCEs and have lower bootstrap support  
674 for clades in anomalous gene trees that conflict with the species tree, but which still yield  
675 congruent estimates of the species tree topology for coalescent methods. Despite lower per-locus  
676 information content, the higher alignment certainty and lower estimated homoplasy of CNEEs  
677 relative to other marker types (Edwards et al. 2017) could allow CNEEs to converge upon the  
678 correct species tree topology for palaeognaths with high support even for intermediate numbers  
679 of loci, but only when methods that accommodate gene tree heterogeneity are used. Simulations  
680 investigating the effects of gene tree estimation error also assume there is no bias in gene tree  
681 estimation, which can cause summary methods to produce inconsistent results (Xi et al. 2015).  
682 We doubt that biased gene trees explain the results for palaeognaths since that explanation would  
683 necessitate a similar bias across data sets of three different marker types, would require bias  
684 prevalent enough to yield consistent results from even small subsampling replicates within  
685 marker types, and would have to generate results that are also consistent with patterns of CR1  
686 insertions.

687 An important and related question is whether we can confidently detect an empirical  
688 anomaly zone given that the same short internal branches expected to produce anomalous gene  
689 trees also increase the likelihood of gene tree estimation error due to the short time interval for  
690 informative substitutions to accumulate in individual loci of finite length (Huang and Knowles

691 2009). Using highly variable markers might not ameliorate the situation for deep divergences  
692 because of the increased probability for subsequent mutations along long terminal branches to  
693 obscure informative substitutions on short antecedent branches (Philippe et al. 2011, Haddrath  
694 and Baker 2012, Liu et al. 2015b). Huang and Knowles (2009) demonstrated through simulation  
695 that the range of species tree branch lengths producing AGTs expands when the mutational  
696 variance of estimated gene trees is considered and that unresolved gene trees, rather than AGTs,  
697 would predominate within this region of tree space. This expanded anomaly zone might be what  
698 is observed for CNEEs in palaeognaths; although ILS between tinamous and other non-ostrich  
699 lineages is clearly evident from CR1 retroelements, only CNEEs infer an anomaly zone in this  
700 region of the species tree. In contrast, all three marker types support an anomaly zone across  
701 branches separating rheas from emu + cassowary and kiwi. For introns and UCEs, the relative  
702 likelihood of anomalous gene trees in most cases is substantially greater than if alignments are  
703 constrained to the species tree topology and clades that conflict with the species tree tend to have  
704 at least 50% median bootstrap support, suggesting that gene tree heterogeneity is real rather than  
705 reflecting gene tree estimation error alone. However, we concur that short internodes pose  
706 substantial challenges to accurate gene tree inference, and investigations of the empirical  
707 anomaly zone should greatly benefit from algorithms that make ‘single-step’ coestimation of  
708 gene trees and species trees scalable to phylogenomic data sets.

709 In conclusion, we find strong evidence that past difficulty in resolving some palaeognath  
710 relationships is likely attributable to extensive incomplete lineage sorting within this group, and  
711 that species tree methods accommodating gene tree heterogeneity produce robustly supported  
712 topologies despite what appears to be an empirical anomaly zone. We echo the sentiments of  
713 other authors that high bootstrap support alone is an inadequate measure of confidence in

714 inferred species trees given increasingly large phylogenomic data sets (Edwards 2016b, Sayyari  
715 and Mirarab 2016). Congruence across marker types and corroboration from rare genomic  
716 changes such as retroposon insertions, as well as phylogenomic subsampling strategies to assess  
717 the underlying phylogenetic signal, will increase our confidence in recovered topologies and  
718 could also highlight which conflicts are robustly supported and merit further investigation  
719 (Tonini et al. 2015, Edwards 2016b, Mirarab et al. 2016, Reddy et al. 2017). Congruence is  
720 certainly not a new idea in phylogenetics, but an increasing emphasis on its importance in the era  
721 of species trees will continue to advance the field beyond reports of highly supported, but often  
722 discordant, ‘total evidence’ topologies toward a more nuanced ‘sum of evidence’ approach that  
723 considers not just which topologies are produced but also what they can tell us about the  
724 underlying evolutionary processes and our attempts to model them.

725

## 726 **ACKNOWLEDGEMENTS**

727 We thank Liang Liu for advice regarding coalescent simulation, and members of the  
728 Edwards lab for helpful discussions. All analyses were run on the Odyssey cluster supported by  
729 the FAS Division of Science, Research Computing Group at Harvard University. Support was  
730 provided by NSF grant DEB 1355343 (EAR 1355292) to AJB, MC, and SVE.

731

## 732 **LITERATURE CITED**

733 Angelis, K., Dos Reis, M. 2015. The impact of ancestral population size and incomplete lineage  
734 sorting on Bayesian estimates of species divergence times. *Curr. Zool.* 61:874–885.  
735 Baker, A.J., Haddrath, O., McPherson, J.D., Cloutier, A. 2014. Genomic support for a moa-  
736 tinamou clade and adaptive morphological convergence in flightless ratites. *Mol. Biol.*



- 737           Evol. 31:1686–1696.
- 738   Blom, M.P.K., Bragg, J.G., Potter, S., Moritz, C. 2017. Accounting for uncertainty in gene tree  
739           estimation: summary-coalescent species tree inference in a challenging radiation of  
740           Australian lizards. *Syst. Biol.* 66:352–366.
- 741   Bogdanowicz, D., Giaro, K., Wrobel, B. 2012. TreeCmp: comparison of trees in polynomial  
742           time. *Evol. Bioinform.* 8:475–487.
- 743   Burnham, K.P., Anderson, D.R. 2002. Model selection and multimodel inference: a practical  
744           information-theoretic approach. Second Edition. New York: Springer.
- 745   Cloutier, A., Sackton, T.B., Grayson, P., Edwards, S.V., Baker, A.J. 2018. First nuclear genome  
746           assembly of an extinct moa species, the little bush moa (*Anomalopteryx didiformis*).  
747           bioRxiv doi: <https://doi.org/10.1101/262816>.
- 748   Cracraft, J., Barker, F.K., Braun, M., Harshman, J., Dyke, G.J., Feinstein, J., Stanley, S., Cibois,  
749           A., Schikler, P., Beresford, P., García-Moreno, J., Sorenson, M.D., Yuri, T., Mindell,  
750           D.P. 2004. Phylogenetic relationships among modern birds (Neornithes): toward an avian  
751           tree of life. In: Cracraft, J., Donoghue, M.J. (eds.), *Assembling the Tree of Life*. Pp. 468–  
752           489. New York: Oxford University Press.
- 753   Degnan, J.H., Rosenberg, N.A. 2006. Discordance of species trees with their most likely gene  
754           trees. *PLoS Genet.* 2:762–768.
- 755   Degnan, J.H., Rosenberg, N.A. 2009. Gene tree discordance, phylogenetic inference and the  
756           multispecies coalescent. *Trends Ecol. Evol.* 24:332–340.
- 757   Delsuc, F., Brinkmann, H., Philippe, H. 2005. Phylogenomics and the reconstruction of the tree  
758           of life. *Nat. Rev. Genet.* 6:361–375.
- 759   Edwards, S.V. 2009. Is a new and general theory of molecular systematics emerging? *Evolution.*

- 760 63:1–19.
- 761 Edwards, S. 2016a. Species trees, inference of. In: Kliman, R.M. (ed.), Encyclopedia of  
762 Evolutionary Biology. Vol. 4, Pp. 236–244. Oxford: Academic Press.
- 763 Edwards, S.V. 2016b. Phylogenomic subsampling: a brief review. *Zool. Scripta* 45:63–74.
- 764 Edwards, S.V., Xi, Z., Janke, A., Faircloth, B.C., McCormack, J.E., Glenn, T.C., Zhong, B., Wu,  
765 S., Lemmon, E.M., Lemmon, A.R., Leache, A.D., Liu, L., Davis, C.C. 2016.  
766 Implementing and testing the multispecies coalescent model: a valuable paradigm for  
767 phylogenomics. *Mol. Phylogenet. Evol.* 94:447–462.
- 768 Edwards, S.V., Cloutier, A., Baker, A.J. 2017. Conserved nonexonic elements: a novel class of  
769 marker for phylogenomics. *Syst. Biol.* 66:1028–1044.
- 770 Eisen, J., Fraser, C. 2003. Phylogenomics: intersection of evolution and genomics. *Science*  
771 300:1706–1707.
- 772 Gee, H. 2003. Evolution – Ending incongruence. *Nature* 425:782.
- 773 Greal, A., Phillips, M., Miller, G., Gilbert, M.T.P., Rouillard, J.-M., Lambert, D., Bunce, M.,  
774 Haile, J. 2017. Eggshell palaeogenomics: palaeognath evolutionary history revealed  
775 through ancient nuclear and mitochondrial DNA from Madagascan elephant bird  
776 (*Aepyornis* sp.) eggshell. *Mol. Phylogenet. Evol.* 109:151–163.
- 777 Hackett, S.J., Kimball, R.T., Reddy, S., Bowie, R.C.K., Braun, E.L., Braun, M.J., Chojnowski,  
778 J.L., Cox, W.A., Han, K.-L., Harshman, J., Huddleston, C.J., Marks, B.D., Miglia, K.J.,  
779 Moore, W.S., Sheldon, F.H., Steadman, D.W., Witt, C.C., Yuri, T. 2008. A  
780 phylogenomic study of birds reveals their evolutionary history. *Science* 320:1763–1768.
- 781 Haddrath, O., Baker, A.J. 2012. Multiple nuclear genes and retroposons support vicariance and  
782 dispersal of the palaeognaths, and an Early Cretaceous origin of modern birds. *Proc. R.*

- 783 Soc. Lond. B. 279:4617–4625.
- 784 Han, K.-L., Braun, E.L., Kimball, R.T., Reddy, S., Bowie, R.C.K., Braun, M.J., Chojnowski,  
785 J.L., Hackett, S.J., Harshman, J., Huddleston, C.J., Marks, B.D., Miglia, K.J., Moore,  
786 W.S., Sheldon, F.H., Steadman, D.W., Witt, C.C., Yuri, T. 2011. Are transposable  
787 element insertions homoplasy free?: an examination using the avian tree of life. *Syst.*  
788 *Biol.* 60:375–386.
- 789 Harshman, J., Braun, E.L., Braun, M.J., Huddleston, C.J., Bowie, R.C.K., Chojnowski, J.L.,  
790 Hackett, S.J., Han, K.-L., Kimball, R.T., Marks, B.D., Miglia, K.J., Moore, W.S., Reddy,  
791 S., Sheldon, F.H., Steadman, D.W., Stepan, S.J., Witt, C.C., Yuri, T. 2008.  
792 Phylogenomic evidence for multiple losses of flight in ratite birds. *Proc. Natl. Acad. Sci.*  
793 *U. S. A.* 105:13462–13467.
- 794 Hickey, G., Paten, B., Earl, D., Zerbino, D., Haussler, D. 2013. HAL: a hierarchical format for  
795 storing and analyzing multiple genome alignments. *Bioinformatics* 29:1341–1342.
- 796 Houde, P.W. 1988. Palaeognathous birds from the early tertiary of the northern hemisphere.  
797 Paynter, R.A. (ed.). Cambridge, MA: Publications of the Nuttall Ornithological Club.
- 798 Huang, H., Knowles, L.L. 2009. What is the danger of the anomaly zone for empirical  
799 phylogenetics? *Syst. Biol.* 58:527–536.
- 800 Huerta-Cepas, J., Serra, F., Bork, P. 2016. ETE 3: reconstruction, analysis, and visualization of  
801 phylogenomic data. *Mol. Biol. Evol.* 33:1635–1638.
- 802 Jarvis, E.D., Mirarab, S., Aberer, A.J., Li, B., Houde, P., Li, C., Ho, S.Y.W., Faircloth, B.C.,  
803 Nabholz, B., Howard, J.T., Suh, A., Weber, C.C., da Fonseca, R.R., Li, J., Zhang, F., Li,  
804 H., Zhou, L., Narula, N., Liu, L., Ganapathy, G., Boussau, B., Bayzid, M.S., Zavidovych,  
805 V., Subramanian, S., Gabaldón, T., Capella-Gutiérrez, S., Huerta-Cepas, J., Rekepalli, B.,

806 Munch, K., Schierup, M., Lindow, B., Warren, W.C., Ray, D., Green, R.E., Bruford,  
807 M.W., Zhan, X., Dixon, A., Li, S., Li, N., Huang, Y., Derryberry, E.P., Bertelsen, M.F.,  
808 Sheldon, F.H., Brumfield, R.T., Mello, C.V., Lovell, P.V., Writhlin, M., Schneider,  
809 M.P.C., Prosdocimi, F., Samaniego, J.A., Velazquez, A.M.V., Alfaro-Núñez, A.,  
810 Campos, P.F., Petersen, B., Sicheritz-Ponten, T., Pas, A., Bailey, T., Scofield, P., Bunce,  
811 M., Lambert, D.M., Zhou, Q., Perelman, P., Driskell, A.C., Shapiro, B., Xiong, Z., Zeng,  
812 Y., Liu, S., Li, Z., Liu, B., Wu, K., Xiao, J., Yingi, X., Zheng, Q., Zhang, Y., Yang, H.,  
813 Wang, J., Smeds, L., Rheindt, F.E., Braun, M., Fjeldsa, J., Orlando, L., Barker, F.K.,  
814 Jønsson, K.A., Johnson, W., Koepfli, K.-P., O'Brien, S., Haussler, D., Ryder, O.A.,  
815 Rahbek, C., Willerslev, E., Graves, G.R., Glenn, T.C., McCormack, J., Burt, D., Ellegren,  
816 H., Alström, P., Edwards, S.V., Stamatakis, A., Mindell, D.P., Cracraft, J., Braun, E.L.,  
817 Warnow, T., Jun, W., Gilbert, M.T.P., Zhang, G. 2014. Whole-genome analyses resolve  
818 early branches in the tree of life of modern birds. *Science* 346:1320–1331.

819 Jarvis, E.D., Mirarab, S., Aberer, A.J., Li, B., Houde, P., Li, C., Ho, S.Y.W., Faircloth, B.C.,  
820 Nabholz, B., Howard, J.T., Suh, A., Weber, C.C., da Fonseca, R.R., Alfaro-Nunez, A.,  
821 Narula, N., Liu, L., Burt, D., Ellegren, H., Edwards, S.V., Stamatakis, A., Mindell, D.P.,  
822 Cracraft, J., Braun, E.L., Warnow, T., Jun, W., Gilbert, M.T.P., Zhang, G. 2015.  
823 Phylogenomic analyses data of the avian phylogenomics project. *GigaScience* 4:4.

824 Jeffroy, O., Brinkmann, H., Delsuc, F., Philippe, H. 2006. Phylogenomics: the beginning of  
825 incongruence? *Trends Genet.* 22:225–231.

826 Katoh, K., Standley, D.M. 2013. MAFFT multiple sequence alignment software version 7:  
827 improvements in performance and usability. *Mol. Biol. Evol.* 30:772–780.

828 Kozlov, A.M., Aberer, A.J., Stamatakis, A. 2015. ExaML version 3: a tool for phylogenomic

- 829 analyses on supercomputers. *Bioinformatics* 31:2577–2579.
- 830 Kubatko, L.S., Degnan, J.H. 2007. Inconsistency of phylogenetic estimates from concatenated  
831 data under coalescence. *Syst. Biol.* 56:17–24.
- 832 Kuritzin, A., Kischka, T., Schmitz, J., Churakov, G. 2016. Incomplete lineage sorting and  
833 hybridization statistics for large-scale retroposon insertion data. *PLoS Comput. Biol.*  
834 12:e1004812.
- 835 Le Duc, D., Renaud, G., Krishnan, A., Almén, M.S., Huynen, L., Prohaska, S.J., Ongyerth, M.,  
836 Bitarello, B.D., Schiöth, H.B., Hofreiter, M., Stadler, P.F., Prüfer, K., Lambert, D., Kelso,  
837 J., Schöneberg, T. 2015. Kiwi genome provides insights into evolution of a nocturnal  
838 lifestyle. *Genome Biol.* 16:147.
- 839 Linkem, C.W., Minin, V.N., Leache, A.D. 2016. Detecting the anomaly zone in species trees and  
840 evidence for a misleading signal in higher-level skink phylogeny (Squamata: Scincidae).  
841 *Syst. Biol.* 65:465–477.
- 842 Liu, L., Yu, L. 2010. Phybase: an R package for species tree analysis. *Bioinformatics* 26:962–  
843 963.
- 844 Liu, L., Yu, L., Edwards, S.V. 2010. A maximum pseudo-likelihood approach for estimating  
845 species trees under the coalescent model. *BMC Evol. Biol.* 10:302.
- 846 Liu, L., Wu, S., Yu, L. 2015a. Coalescent methods for estimating species trees from  
847 phylogenomic data. *J. Syst. Evol.* 53:380–390.
- 848 Liu, L., Xi, Z., Davis, C.C. 2015b. Coalescent methods are robust to the simultaneous effects of  
849 long branches and incomplete lineage sorting. *Mol. Biol. Evol.* 32:791–805.
- 850 Liu, L., Xi, Z., Wu, S., Davis, C.C., Edwards, S.V. 2015c. Estimating phylogenetic trees from  
851 genome-scale data. *Ann. N.Y. Acad. Sci.* 1360:36–53.

- 852 Maddison, W. 1997. Gene trees in species trees. *Syst. Biol.* 46:523–536.
- 853 McCormack, J.E., Harvey, M.G., Faircloth, B.C., Crawford, N.G., Glenn, T.C., Brumfield, R.T.  
854 2013. A phylogeny of birds based on over 1,500 loci collected by target enrichment and  
855 high-throughput sequencing. *PLOS ONE* 8:e54848.
- 856 Mendes, F.K., Hahn, M.W. 2016. Gene tree discordance causes apparent substitution rate  
857 variation. *Syst. Biol.* 65:711–721.
- 858 Mirarab, S., Warnow, T. 2015. ASTRAL-II: coalescent-based species tree estimation with many  
859 hundreds of taxa and thousands of genes. *Bioinformatics* 31:44–52.
- 860 Mirarab, S., Bayzid, M.S., Warnow, T. 2016. Evaluating summary methods for multilocus  
861 species tree estimation in the presence of incomplete lineage sorting. *Syst. Biol.* 65:366–  
862 380.
- 863 Mitchell, K.J., Llamas, B., Soubrier, J., Rawlence, N.J., Worthy, T.H., Wood, J., Lee, M.S.Y.,  
864 Cooper, A. 2014. Ancient DNA reveals elephant birds and kiwi are sister taxa and  
865 clarifies ratite bird evolution. *Science* 344:898–900.
- 866 Nguyen, L.-T., Schmidt, H.A., von Haeseler, A., Minh, B.Q. 2015. IQ-TREE: a fast and  
867 effective stochastic algorithm for estimating maximum-likelihood phylogenies. *Mol.*  
868 *Biol. Evol.* 32:268–274.
- 869 Pamilo, P., Nei, M. 1988. Relationships between gene trees and species trees. *Mol. Biol. Evol.*  
870 5:568–583.
- 871 Philippe, H., Brinkmann, H., Lavrov, D.V., Littlewood, T.J., Manuel, M., Wörheide, G.,  
872 Baurain, D. 2011. Resolving difficult phylogenetic questions: why more sequences are  
873 not enough. *PLoS Biol.* 9:e1000602.
- 874 Phillips, M.J., Gibb, G.C., Crimp, E.A., Penny, D. 2010. Tinamous and moa flock together:

- 875 mitochondrial genome sequence analysis reveals independent losses of flight among  
876 ratites. *Syst. Biol.* 59:90–107.
- 877 Prüfer, K., Munch, K., Hellmann, I., Akagi, K., Miller, J.R., Walenz, B., Koren, S., Sutton, G.,  
878 Kodira, C., Winer, R., Knight, J.R., Mullikin, J.C., Meader, S.J., Ponting, C.P., Lunter,  
879 G., Higashino, S., Hobolth, A., Dutheil, J., Karakoç, E., Alkan, C., Sajjadian, S.,  
880 Catacchio, C.R., Ventura, M., Marques-Bonet, T., Eichler, E.E., André, C., Atencia, R.,  
881 Mugisha, L., Junhold, J., Patterson, N., Siebauer, M., Good, J.M., Fischer, A., Ptak, S.E.,  
882 Lachmann, M., Symer, D.E., Mailund, T., Schierup, M. H., Andrés, A.M., Kelso, J.,  
883 Pääbo, S. 2012. The bonobo genome compared with the chimpanzee and human  
884 genomes. *Nature* 486:527–531.
- 885 Prum, R.O., Berv, J.S., Dornburg, A., Field, D.J., Townsend, J.P., Lemmon, E.M., Lemmon,  
886 A.R. 2015. A comprehensive phylogeny of birds (Aves) using targeted next-generation  
887 DNA sequencing. *Nature* 526:569–573.
- 888 Quinlan, A.R., Hall, I.M. 2010. BEDTools: a flexible suite of utilities for comparing genomic  
889 features. *Bioinformatics* 26:841–842.
- 890 Ray, D.A., Xing, J., Salem, A.-H., Batzer, M.A. 2006. SINEs of a nearly perfect character. *Syst.*  
891 *Biol.* 55:928–935.
- 892 Reddy, S., Kimball, R.T., Pandey, A., Hosner, P.A., Braun, M.J., Hackett, S.J., Han, K.-L.,  
893 Harshman, J., Huddleston, C.J., Kingston, S., Marks, B.D., Miglia, K.J., Moore, W.S.,  
894 Sheldon, F.H., Witt, C.C., Yuri, T., Braun, E.L. 2017. Why do phylogenomic data sets  
895 yield conflicting trees? Data type influences the avian tree of life more than taxon  
896 sampling. *Syst. Biol.* 66:857–879.
- 897 Roch, S., Steel, M. 2015. Likelihood-based tree reconstruction on a concatenation of aligned

- 898 sequence data sets can be statistically inconsistent. *Theor. Popul. Biol.* 100:56–62.
- 899 Roch, S., Warnow, T. 2015. On the robustness to gene tree estimation error (or lack thereof) of  
900 coalescent-based species tree methods. *Syst. Biol.* 64:663–676.
- 901 Rokas, A., Williams, B., King, N., Carroll, S. 2003. Genome-scale approaches to resolving  
902 incongruence in molecular phylogenies. *Nature* 425:798–804.
- 903 Rosenberg, N.A. 2013. Discordance of species trees with their most likely gene trees: a unifying  
904 principle. *Mol. Biol. Evol.* 30:2709–2713.
- 905 Sackton, T.B., Grayson, P., Cloutier, A., Hu, Z., Liu, J., Wheeler, N., Gardner, P., Clarke, J.,  
906 Baker, A.J., Clamp, M., Edwards, S.V. 2018. Convergent regulatory evolution and the  
907 origin of flightlessness in palaeognathous birds. bioRxiv doi:  
908 <https://doi.org/10.1101/262584>.
- 909 Salichos, L., Stamatakis, A., Rokas, A. 2014. Novel information theory-based measures for  
910 quantifying incongruence among phylogenetic trees. *Mol. Biol. Evol.* 31:1261–1271.
- 911 Sayyari, E., Mirarab, S. 2016. Fast coalescent-based computation of local branch support from  
912 quartet frequencies. *Mol. Biol. Evol.* 33:1654–1668.
- 913 Seo, T.-K. 2008. Calculating bootstrap probabilities of phylogeny using multilocus sequence  
914 data. *Mol. Biol. Evol.* 25:960–971.
- 915 Smit, A.F.A., Hubley, R., Green, P. 2015. RepeatMasker Open-4.0.  
916 <http://www.repeatmasker.org>.
- 917 Smith, J.V., Braun, E.L., Kimball, R.T. 2013. Ratite nonmonophyly: independent evidence from  
918 40 novel loci. *Syst. Biol.* 62:35–49.
- 919 Song, S., Liu, L., Edwards, S.V., Wu, S. 2012. Resolving conflict in eutherian mammal  
920 phylogeny using phylogenomics and the multispecies coalescent model. *Proc. Natl. Acad.*



- 921           Sci. U. S. A. 109:14942–14947.
- 922   Stamatakis, A. 2014. RAxML version 8: a tool for phylogenetic analysis and post-analysis of  
923           large phylogenies. *Bioinformatics* 30:1312–1313.
- 924   Suh, A., Smeds, L., Ellegren, H. 2015. The dynamics of incomplete lineage sorting across the  
925           ancient adaptive radiation of Neoavian birds. *PLoS Biol.* 13:e1002224.
- 926   Suh, A. 2016. The phylogenomic forest of bird trees contains a hard polytomy at the root of  
927           Neoaves. *Zool. Scripta* 45:50–62.
- 928   Swofford, D.L. 2002. *Phylogenetic analysis using parsimony (\*and other methods)*. Version 4.  
929           Sinauer Associates, Sunderland, MA.
- 930   Tonini, J., Moore, A., Stern, D., Shcheglovitova, M., Orti, G. 2015. Concatenation and species  
931           tree methods exhibit statistically indistinguishable accuracy under a range of simulated  
932           conditions. *PLoS Currents* 7:10.1371/currents.tol.34260cc27551a527b124ec5f6334b6be.
- 933   Xi, Z., Liu, L., Davis, C.C. 2015. Genes with minimal phylogenetic information are problematic  
934           for coalescent analyses when gene tree estimation is biased. *Mol. Phylogenet. Evol.*  
935           92:63–71.
- 936   Xu, B., Yang, Z. 2016. Challenges in species tree estimation under the multispecies coalescent  
937           model. *Genetics* 204:1353–1368.
- 938   Yonezawa, T., Segawa, T., Mori, H., Campos, P.F., Hongoh, Y., Endo, H., Akiyoshi, A., Kohno,  
939           N., Nishida, S., Wu, J., Jin, H., Adachi, J., Kishino, H., Kurokawa, K., Nogi, Y., Tanabe,  
940           H., Mukoyama, H., Yoshida, K., Rasoamiaramanana, A., Yamagishi, S., Hayashi, Y.,  
941           Yoshida, A., Koike, H., Akishinonomiya, F., Willerslev, E., Hasegawa, M. 2017.  
942           Phylogenomics and morphology of extinct paleognaths reveal the origin and evolution of  
943           the ratites. *Curr. Biol.* 27:68–77.

944 Zhang, G., Li, B., Li, C., Gilbert, M.T.P., Jarvis, E.D., Wang, J. 2014. Comparative genomic data  
945 of the avian phylogenomics project. *GigaScience* 3:26.

946

947 **FIGURE CAPTIONS**

948 **Figure 1** Palaeognath relationships inferred from the total evidence data set (TENT) of 20,850  
949 loci using MP-EST (a) and ASTRAL (b) species tree methods, and maximum likelihood analysis  
950 of concatenated data with ExaML (c). Bootstrap support values are indicated for clades with <  
951 100% support. Scale bars indicate branch length in coalescent units for MP-EST and ASTRAL  
952 and in substitutions/site for ExaML. Terminal branches in MP-EST and ASTRAL species trees  
953 are uninformative and are drawn as a constant value across taxa.

954 **Figure 2** Support for alternative hypotheses of the sister group to rheas from phylogenomic  
955 subsampling using MP-EST (a-c), ASTRAL (d-f), and ExaML (g-i). Plots display the mean  
956 bootstrap support for each hypothesis from 10 replicates of randomly sampled loci within each  
957 data set size category (e.g. 50–3000 loci, shown on x-axis).

958 **Figure 3** Heatmap of the number of replicates from phylogenomic subsampling that support  
959 each alternative hypothesis for the sister group to rheas at a minimum bootstrap support of 70%  
960 (a-i) and 90% (j-r). Rows labelled H1-H5 within each panel correspond to the five alternative  
961 hypotheses outlined in the legend. Columns within each panel labelled 50-3000 indicate the  
962 number of loci subsampled at random with replacement from all loci for each marker type.  
963 Coloring of cells indicates the number of replicates (of 10 in total for each data set size category)  
964 that support each hypothesis at the given bootstrap cut off, corresponding to the colouring  
965 scheme outlined in the legend.

966 **Figure 4** CR1 retroelements corroborate the inferred species tree topology from MP-EST and

967 ASTRAL (a), and also display conflicting insertion patterns consistent with incomplete lineage  
968 sorting (b-e). Numbers in colored balls indicate the number of shared retroelement insertions for  
969 each clade. Bird illustrations were obtained under the Creative Commons License from  
970 Wikimedia Commons (<https://commons.wikimedia.org>; full details are given in Supplemental  
971 Table S2).

972 **Figure 5** Distributions of the 50 most common gene tree topologies for CNEEs (a), introns (b),  
973 and UCEs (c), showing that the most common gene tree topology for each marker type does not  
974 match the inferred species tree topology. Symbols and bar coloring in parts a-c correspond to the  
975 topologies shown in (d).

976 **Figure 6** Gene tree support for clades recovered in the MP-EST and ASTRAL species trees for  
977 CNEEs (a), introns (b), and UCEs (c). Gene support frequency (GSF, the percent of gene trees  
978 containing each clade) is given beneath branches, with heatmap coloring of branches according  
979 to GSF as indicated in the legend. Values above branches give the internode certainty ‘all’  
980 statistic (ICA, Salichos et al. 2014), indicating support for each clade relative to all other  
981 conflicting bipartitions in the set of gene trees.

982 **Figure 7** Support for observed topological heterogeneity in estimated gene trees. (a-c)  
983 Distributions for the average bootstrap support for all clades recovered in majority rule extended  
984 consensus gene trees (‘MRE consensus topology’, drawn as solid bars), and the average support  
985 when bootstrap replicates for each gene are constrained to the inferred species tree topology  
986 (open bars). Values above each panel indicate the decrease in the grand mean of average support  
987 across genes when bootstrap replicates are constrained to the species tree topology. (d) Support  
988 that observed gene tree topologies differ from the inferred species tree. Dark gray bars indicate  
989 the difference in Akaike information criterion (AIC) from values calculated using the MRE

990 consensus topology for each gene, relative to that obtained when the sequence alignment is  
991 constrained to the species tree topology. The baseline at 0 corresponds to  $\Delta\text{AIC} = -2$ , thus values  
992 beneath this line indicate loci where likelihood values support the gene tree topology  
993 substantially better than that of the species tree. Results of approximately unbiased (AU) tests  
994 are indicated with medium gray bars showing the proportion of loci that reject (below baseline)  
995 and fail to reject (above baseline) the species tree topology at a P-value cut off of 0.05, and light  
996 gray bars showing the proportion of loci where the species tree topology occurs among the top  
997 5% of candidate topologies (above baseline), or is within the bottom 95% of tested topologies  
998 (below baseline) for AU P-values ranked in ascending order. AU tests for the 105 and 1575  
999 candidate tree sets produced similar results and are shown for the 105 candidate set only.

1000 **Figure 8** Pairwise distances between gene trees and the MP-EST/ASTRAL species tree  
1001 topology. Distances between each gene tree and the species tree topology were calculated as the  
1002 matching cluster distance (a) or Robinson-Foulds cluster distance (b) on outgroup rooted trees,  
1003 and mean values for all pairwise gene tree–species tree distances within each category are  
1004 shown. Error bars indicate the 95% confidence interval of the mean. Distances were calculated  
1005 for empirically estimated gene trees and for data sets of 10,000 gene trees that were simulated  
1006 using coalescent branch lengths from the MP-EST and ASTRAL species trees. Values above  
1007 bars for simulated data sets indicate the ratios of means for simulated data sets compared to the  
1008 mean for empirically estimated gene trees.

1009 **Figure 9** Proportions of rooted triplets for the three alternative topologies involving rheas, kiwi,  
1010 and emu + cassowary. (a-c) Observed proportions of the major and two minor topologies from  
1011 empirically estimated gene trees. (d-f) Expected proportions based on the length of the internal  
1012 branch within the triplet (e.g. the common ancestor of kiwi + emu/cassowary) in coalescent

1013 units, following Pamilo and Nei (1988). For d-f, pie charts on the left and right give expected  
1014 proportions based on branch lengths from MP-EST and ASTRAL species trees, respectively.

1015 **Figure 10** Pairs of short successive internal branches are consistent with expectations for the  
1016 anomaly zone. Species tree topologies for CNEEs (a), introns (b), and UCEs (c) are shown with  
1017 internal branch lengths in coalescent units estimated from best maximum likelihood gene trees  
1018 with MP-EST. Terminal branch lengths are uninformative and are drawn as a constant value  
1019 across taxa. Coalescent branch lengths for all pairs of branches (x and y) are given in (d), with  
1020  $a(x)$  calculated following Equation 4 from Degnan and Rosenberg (2006). Anomalous gene trees  
1021 are expected when  $y < a(x)$ . Clades fulfilling this anomaly zone criterion are shaded in (d), with  
1022 the corresponding branches indicated in a-c.

1023 **Suppl. Figure S1** Palaeognath phylogenetic relationships inferred with MP-EST (a-d) and  
1024 ASTRAL (e-h) coalescent-based species tree methods and maximum-likelihood inference of  
1025 fully partitioned concatenated alignments with ExaML (i-l). Topologies were inferred from  
1026 12,676 conserved non-exonic elements (CNEEs), 5,016 introns, 3,158 ultraconserved elements  
1027 (UCEs), and the total evidence data set of 20,850 loci combined across marker types (TENT).  
1028 Bootstrap supports are drawn for clades with  $< 100\%$  support.

1029 **Suppl. Figure S2** Support for alternative hypotheses of the sister group to emu + cassowary  
1030 from phylogenomic subsampling using MP-EST (a-c), ASTRAL (d-f), and ExaML (g-i). Plots  
1031 display the mean bootstrap support for each hypothesis from 10 replicates of randomly sampled  
1032 loci within each data set size category (e.g. 50–3000 loci, shown on x-axis).

1033 **Suppl. Figure S3** Heatmap of the number of replicates from phylogenomic subsampling that  
1034 support each alternative hypothesis for the sister group to emu + cassowary at a minimum  
1035 bootstrap support of 70% (a-i) and 90% (j-r). Rows labelled H1-H4 within each panel

1036 correspond to the four alternative hypotheses outlined in the legend. Columns within each panel  
1037 labelled 50-3000 indicate the number of loci subsampled at random with replacement from all  
1038 loci for each marker type. Coloring of cells indicates the number of replicates (of 10 in total for  
1039 each data set size category) that support each hypothesis at the given bootstrap cut off,  
1040 corresponding to the colouring scheme outlined in the legend.

1041 **Suppl. Figure S4** Support for the four most common gene tree topologies for each marker type.  
1042 Median bootstrap support (a-c) and the median number of substitutions under a parsimony  
1043 criterion (d-f) for branches in gene tree topologies that conflict with the species tree. Letters  
1044 below each group refer to topologies shown in (j), with numbers referring to branches labelled on  
1045 those topologies. Reference lines in (a-c) are drawn at 50% bootstrap support. (g-i) Violin plots  
1046 of  $\Delta AIC$  for loci belonging to each AGT category. Values show the difference in AIC for  
1047 sequence alignments given the majority rule extended consensus gene tree topology, relative to  
1048 the AIC when sequence alignments are constrained to the species tree topology. A reference line  
1049 is drawn at  $\Delta AIC_{(\text{gene tree} - \text{species tree})} = -2$ , with values beneath this cut off indicating substantially  
1050 stronger support in favor of the gene tree topology (Burnham and Anderson 2002).

1051 **Suppl. Figure S5** Summary measures of aligned sequence data for each marker type (CNEEs,  
1052 introns, UCEs), showing the total aligned sequence length per locus (a-c), variable alignment  
1053 columns as a percent of the total alignment length (d-f), and the percent of parsimony  
1054 informative alignment columns per locus (g-i).

1055 **Suppl. Figure S6** Pairs of short successive internal branches are consistent with expectations for  
1056 the anomaly zone. Species tree topologies for CNEEs (a), introns (b), and UCEs (c) are shown  
1057 with internal branch lengths in coalescent units estimated from best maximum likelihood gene  
1058 trees with ASTRAL. Terminal branch lengths are uninformative and are drawn as a constant

1059 value across taxa. Coalescent branch lengths for all pairs of branches (x and y) are given in (d),  
1060 with  $a(x)$  calculated following Equation 4 from Degnan and Rosenberg (2006). Anomalous gene  
1061 trees are expected when  $y < a(x)$ . Clades fulfilling this anomaly zone criterion are shaded in (d),  
1062 with the corresponding branches indicated in a-c.

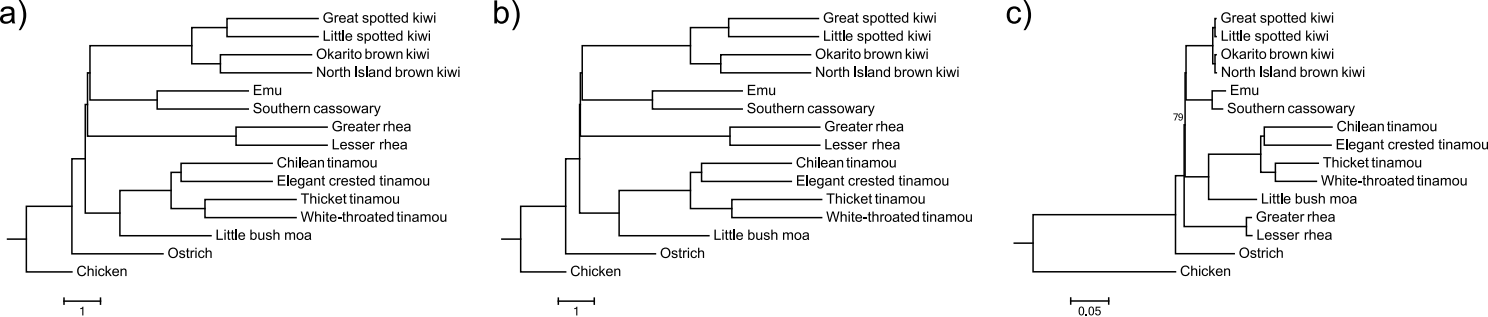

Fig. 1



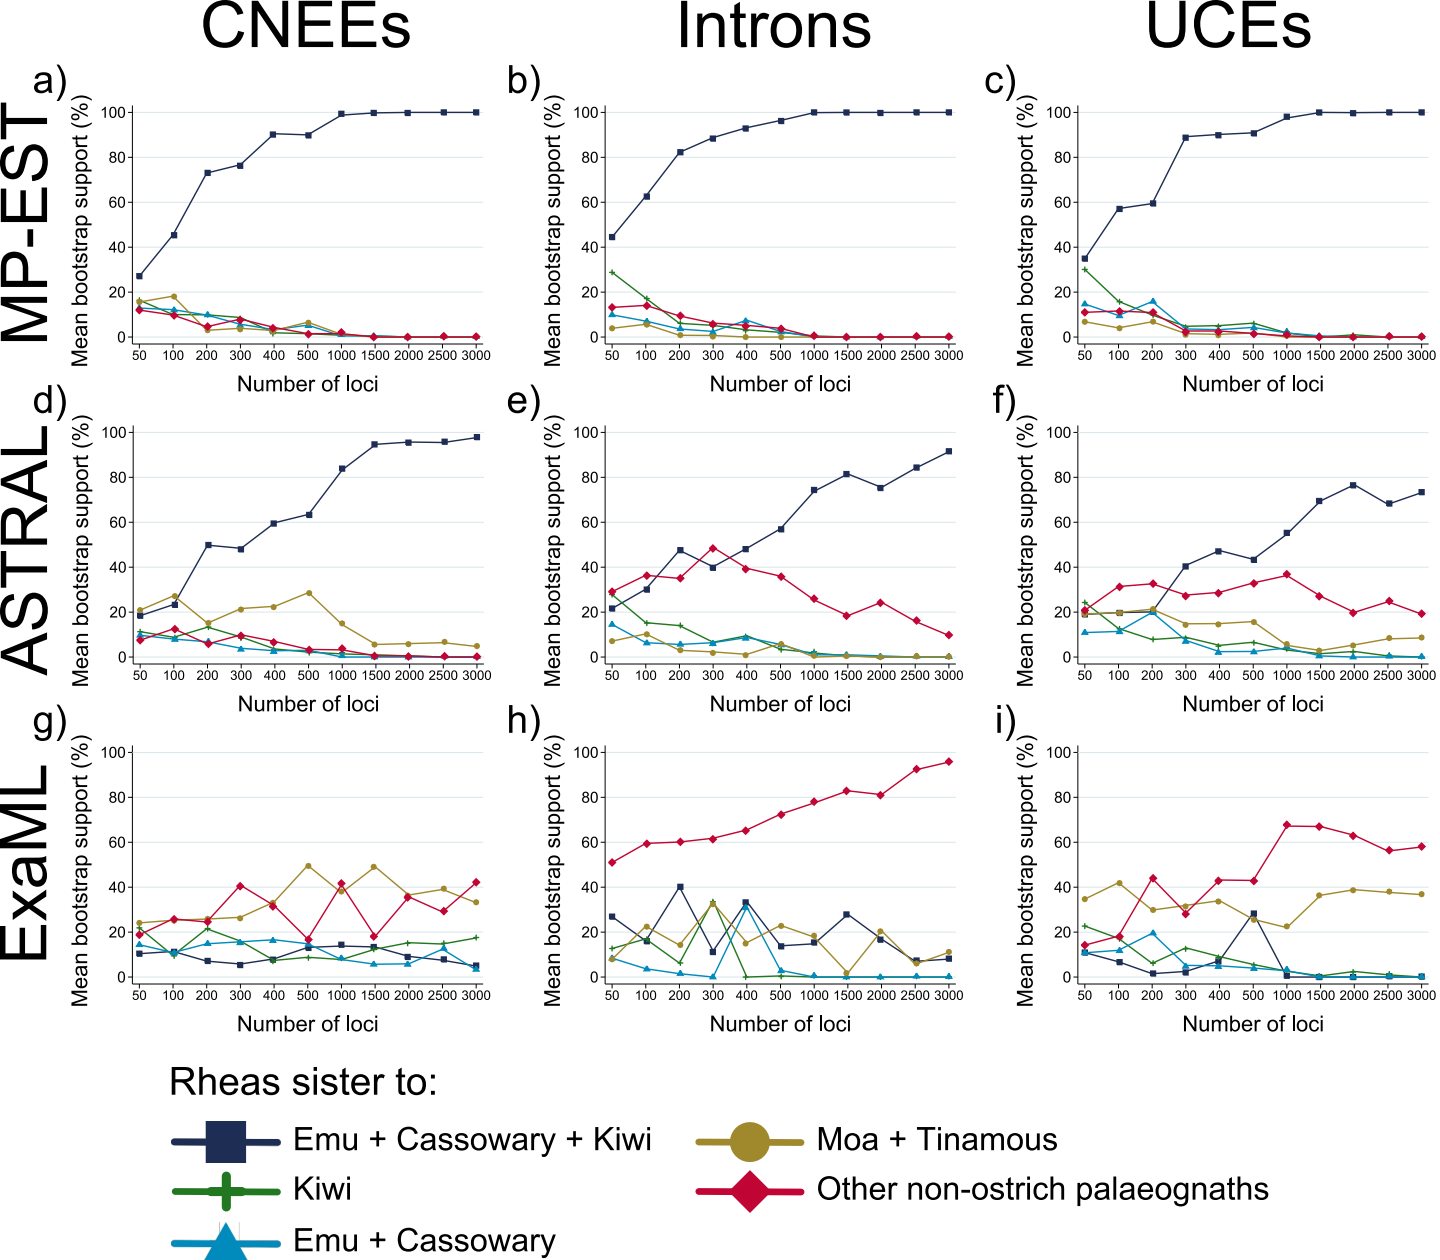

**Fig. 2**

# CNEEs

# Introns

# UCEs

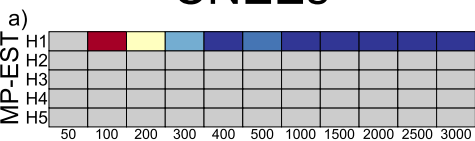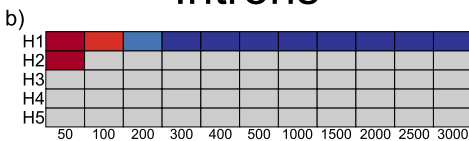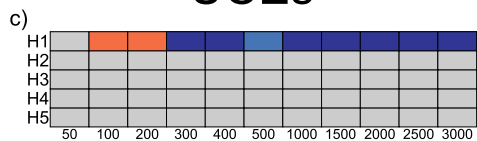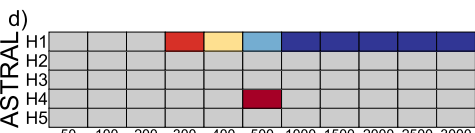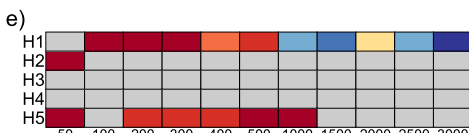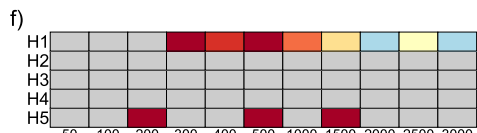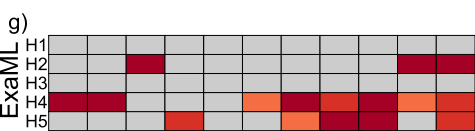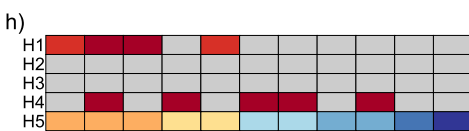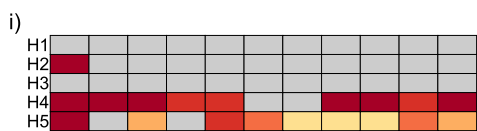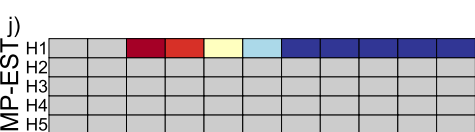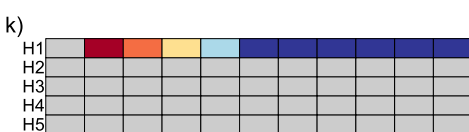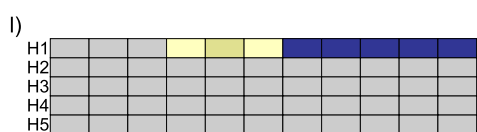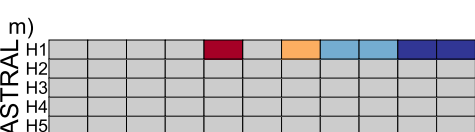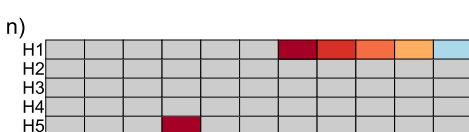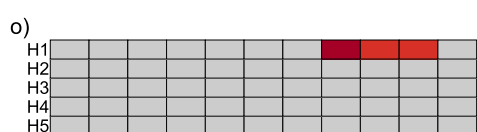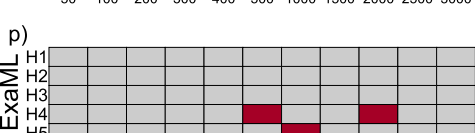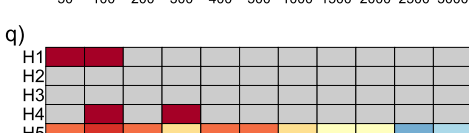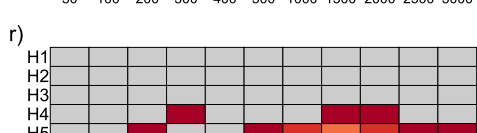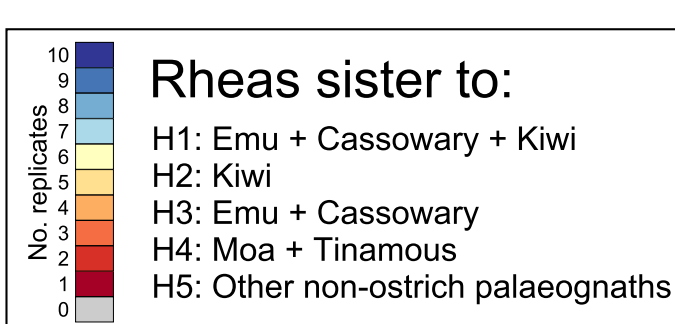

**Fig. 3**

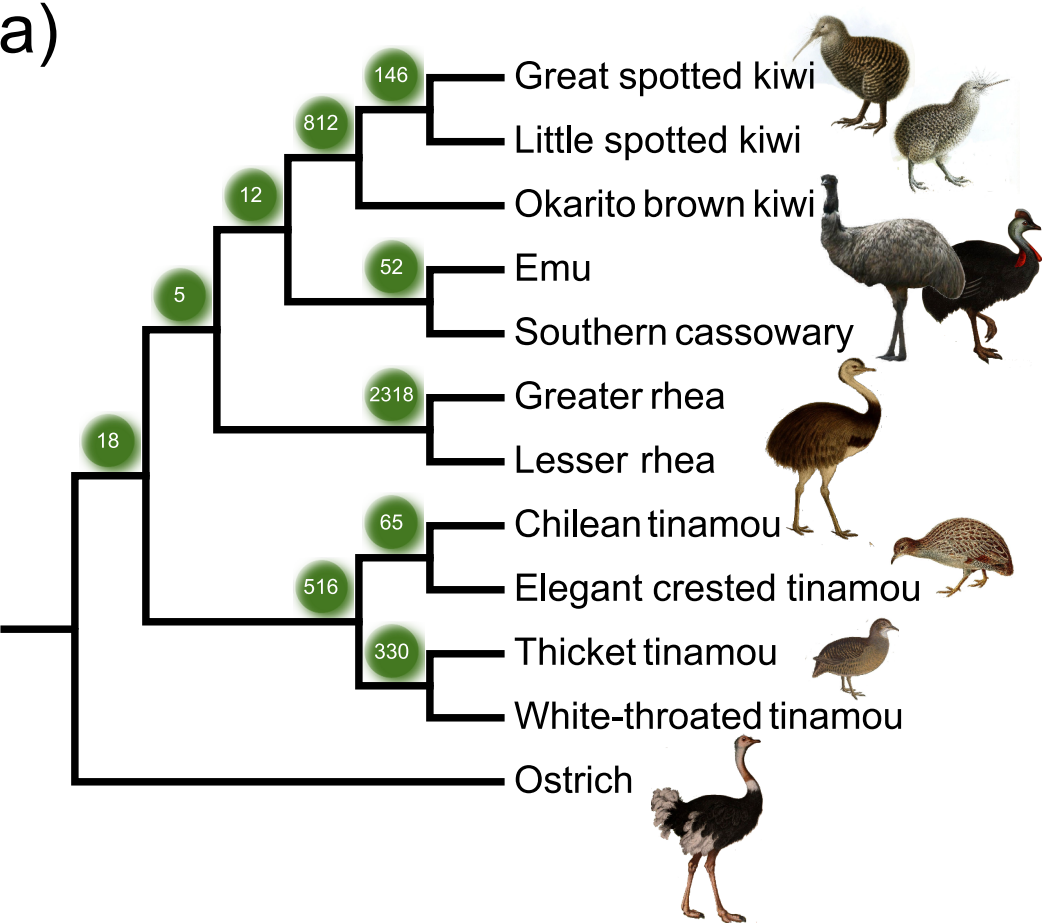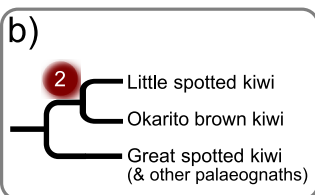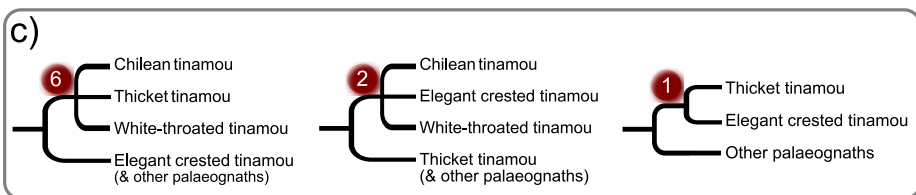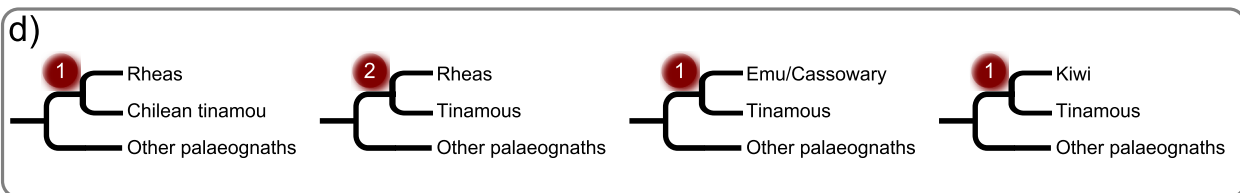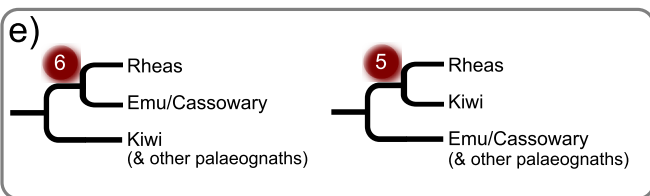

Fig. 4

### a) CNEEs

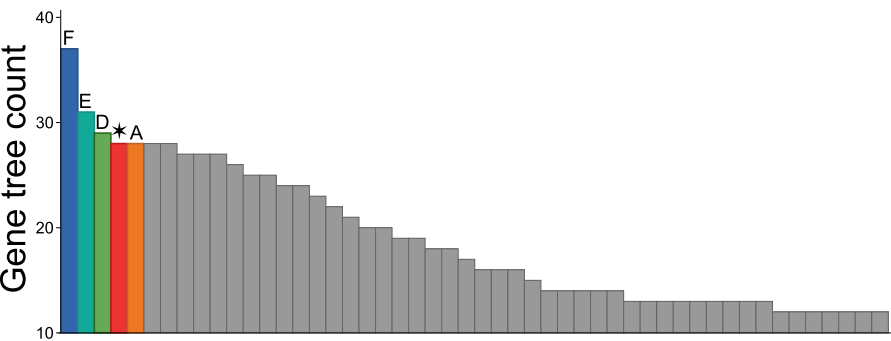

### b) Introns

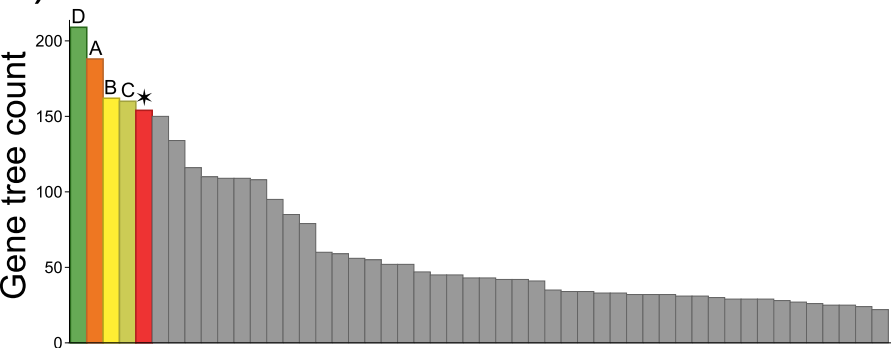

### c) UCEs

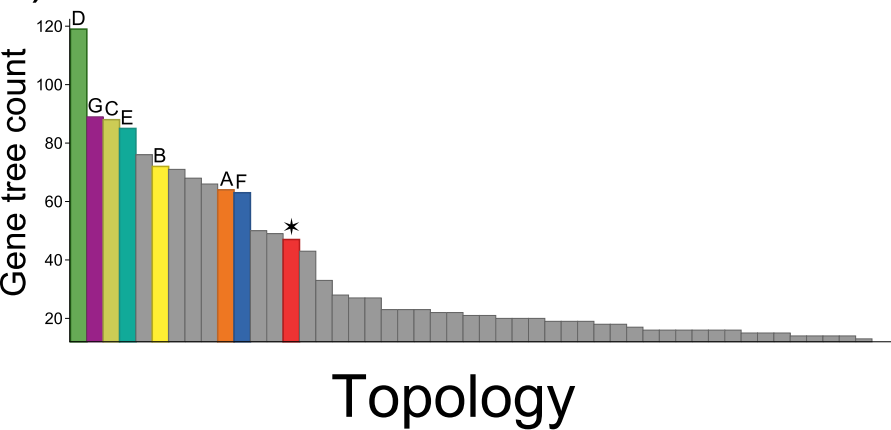

### d)

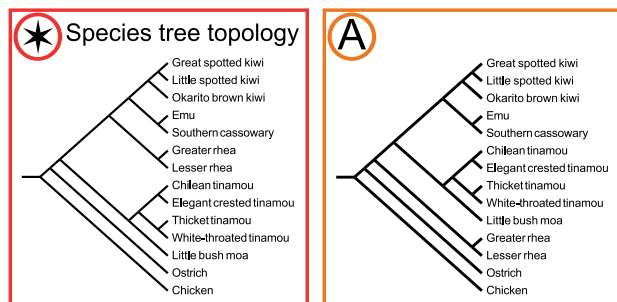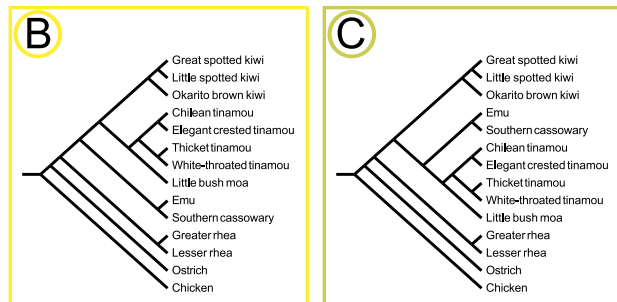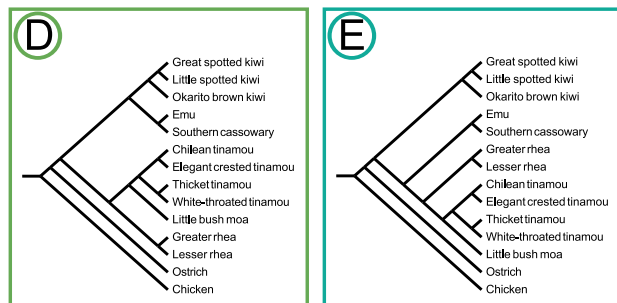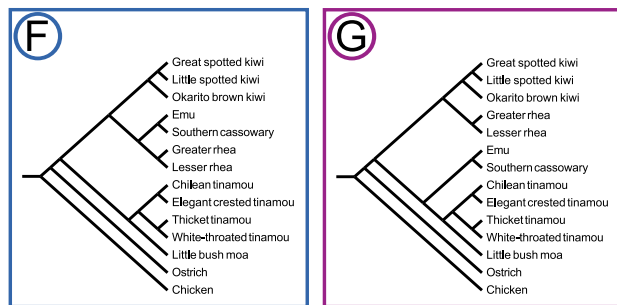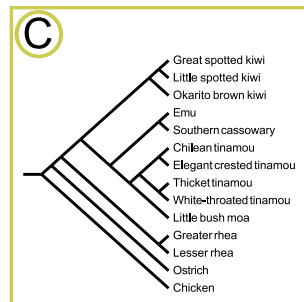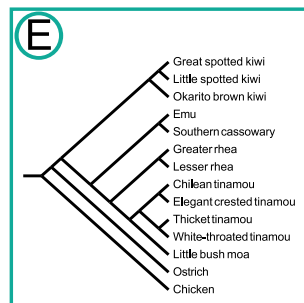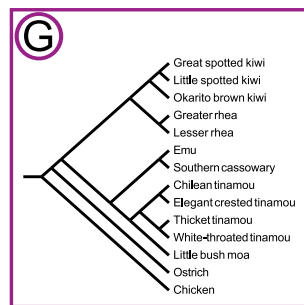

Fig. 5

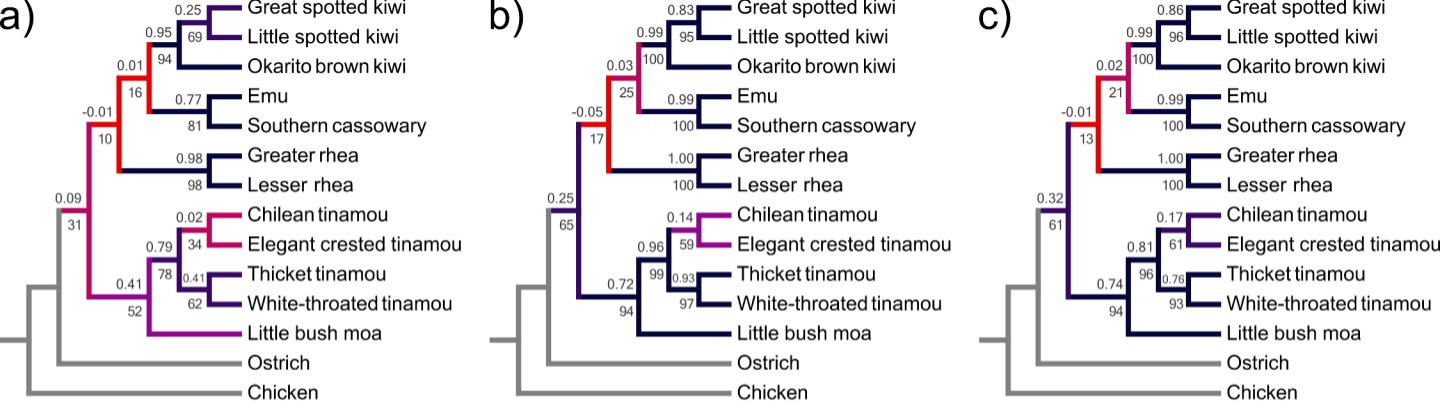

Fig. 6

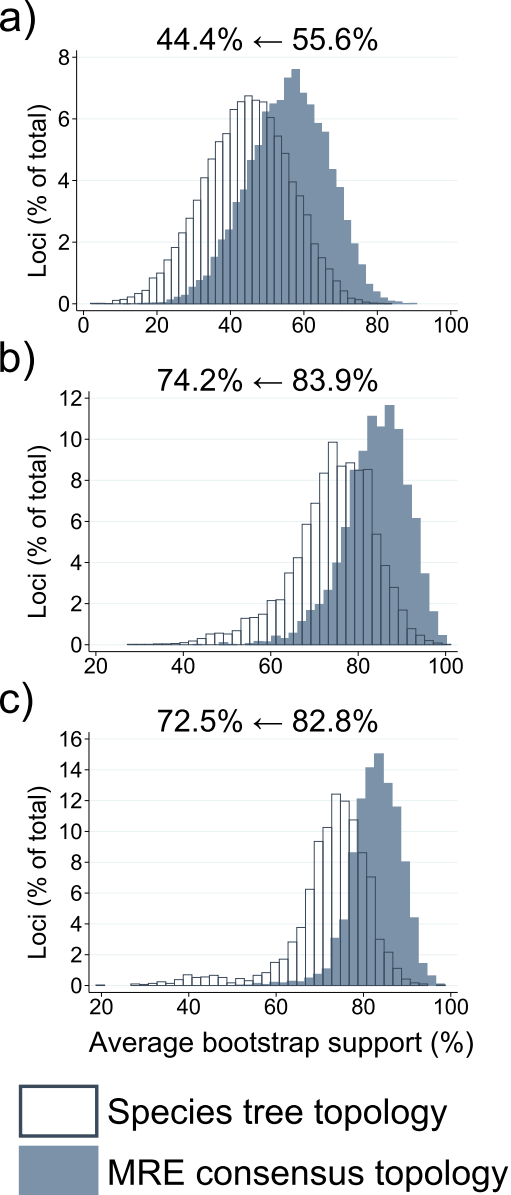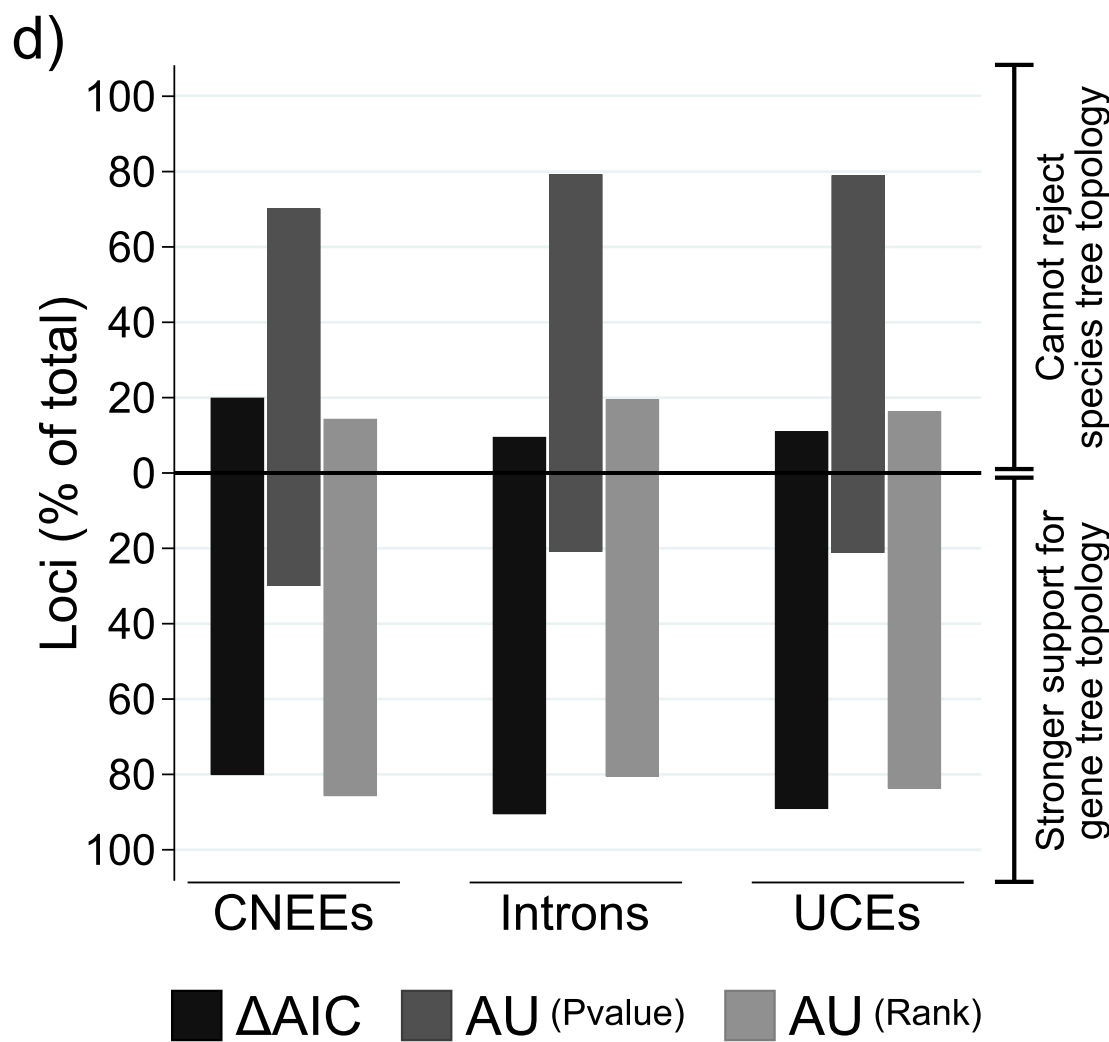

**Fig. 7**

a)

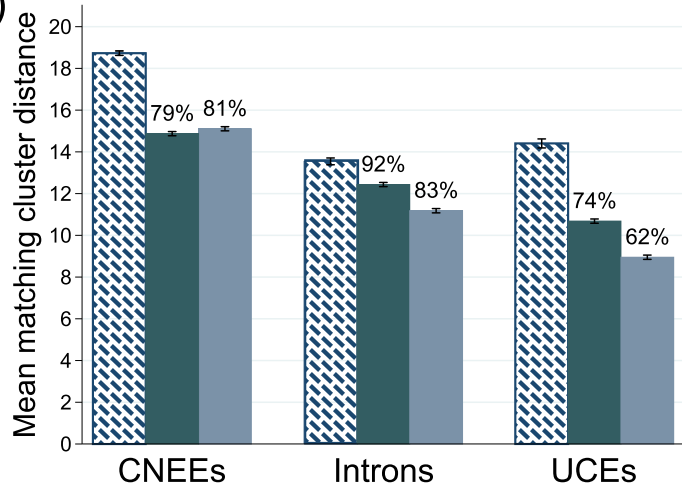

b)

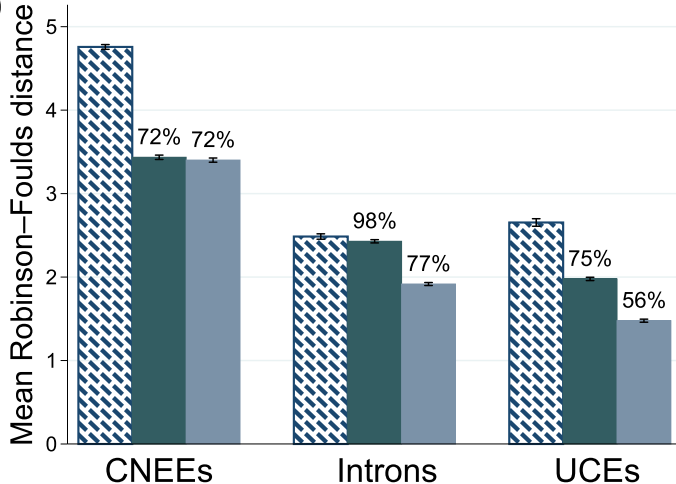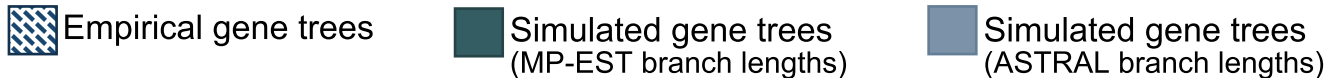

**Fig. 8**

# CNEEs

# Introns

# UCEs

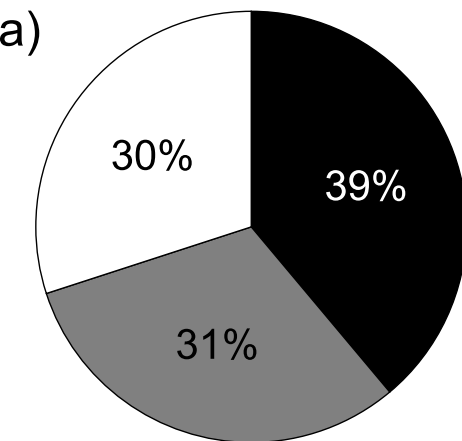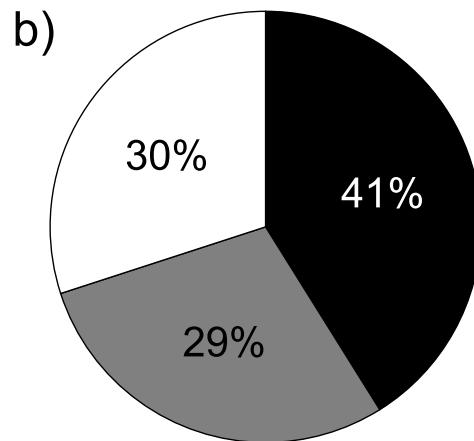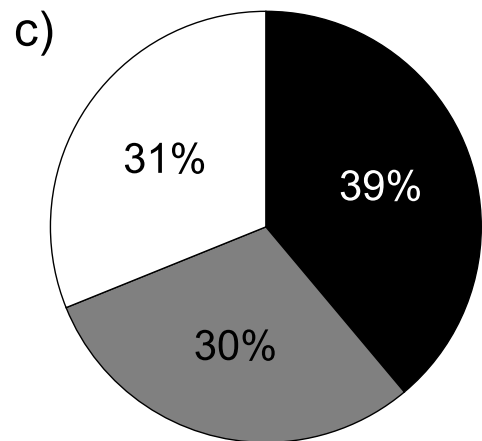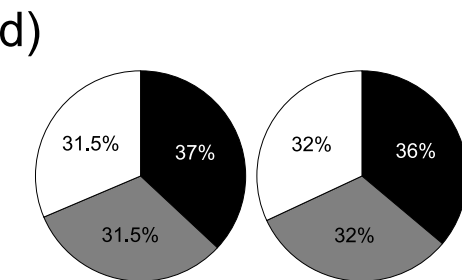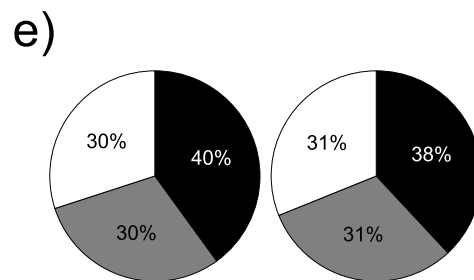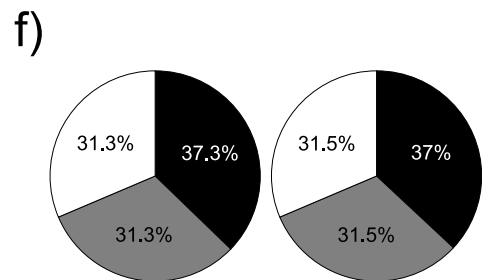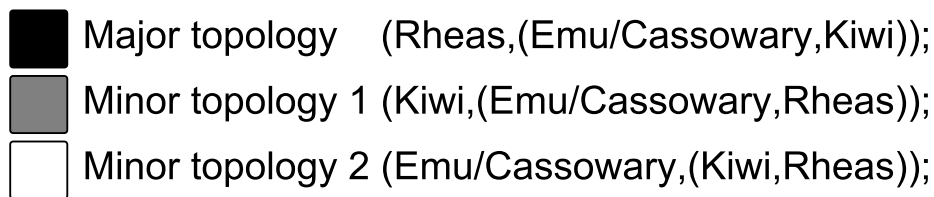

Fig. 9



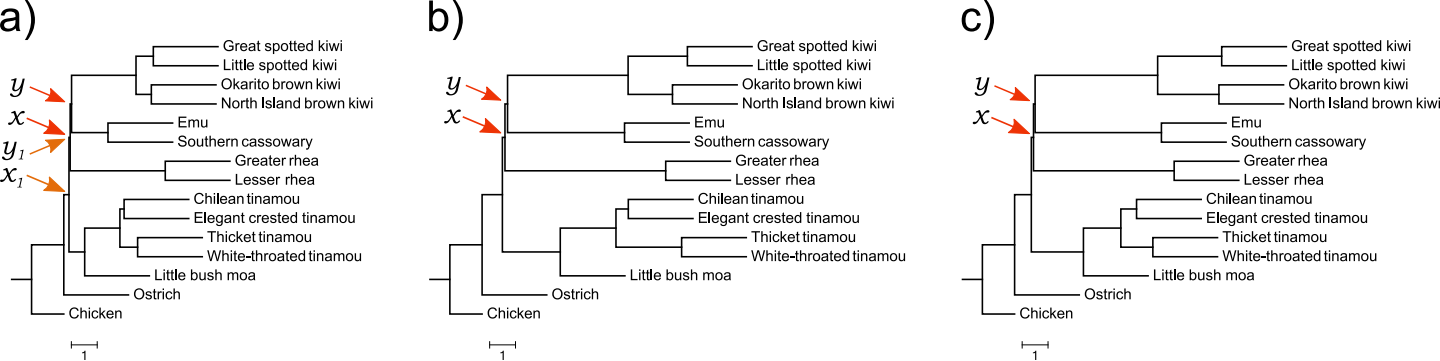

d)

| Clade 1                      | Clade 2                           | CNEEs |        |       | Introns |        |       | UCEs  |        |       |
|------------------------------|-----------------------------------|-------|--------|-------|---------|--------|-------|-------|--------|-------|
|                              |                                   | $x$   | $a(x)$ | $y$   | $x$     | $a(x)$ | $y$   | $x$   | $a(x)$ | $y$   |
| All Kiwi                     | Spotted kiwi                      | 2.490 | -0.383 | 0.667 | 4.661   | -0.403 | 2.290 | 4.737 | -0.403 | 2.475 |
| All Kiwi                     | Brown kiwi                        | 2.490 | -0.383 | 0.592 | 4.661   | -0.403 | 1.716 | 4.737 | -0.403 | 2.369 |
| Emu/Cassowary + Kiwi         | Emu/Cassowary                     | 0.057 | 0.595  | 1.407 | 0.098   | 0.335  | 4.525 | 0.062 | 0.550  | 4.887 |
| Emu/Cassowary + Kiwi         | Kiwi                              | 0.057 | 0.595  | 2.490 | 0.098   | 0.335  | 4.661 | 0.062 | 0.550  | 4.737 |
| Emu/Cassowary + Kiwi + Rheas | Rheas                             | 0.045 | 0.729  | 3.676 | 0.099   | 0.330  | 6.213 | 0.087 | 0.387  | 5.438 |
| Emu/Cassowary + Kiwi + Rheas | Emu/Cassowary + Kiwi              | 0.045 | 0.729  | 0.057 | 0.099   | 0.330  | 0.098 | 0.087 | 0.387  | 0.062 |
| All Tinamous                 | Thicket & White-throated tinamou  | 1.359 | -0.326 | 0.682 | 2.150   | -0.373 | 2.537 | 1.443 | -0.334 | 1.236 |
| All Tinamous                 | Chilean & Elegant crested tinamou | 1.359 | -0.326 | 0.165 | 2.150   | -0.373 | 0.479 | 1.443 | -0.334 | 0.610 |
| Moa + Tinamous               | Tinamous                          | 0.608 | -0.191 | 1.359 | 2.239   | -0.376 | 2.150 | 2.017 | -0.368 | 1.443 |
| Non-ostrich palaeognaths     | Emu/Cassowary + Kiwi + Rheas      | 0.204 | 0.074  | 0.045 | 0.781   | -0.239 | 0.099 | 0.643 | -0.202 | 0.087 |
| Non-ostrich palaeognaths     | Moa + Tinamous                    | 0.204 | 0.074  | 0.608 | 0.781   | -0.239 | 2.239 | 0.643 | -0.202 | 2.017 |

Fig. 10
